1 September 3, 2021

2

3 **Collagen polarization promotes epithelial elongation by stimulating**  
4 **locoregional cell proliferation.**

5

6 Hiroko Katsuno-Kambe<sup>1</sup>, Jessica L. Teo<sup>1</sup>, Robert J. Ju<sup>1</sup>, James E. Hudson<sup>2</sup>,  
7 Samantha J. Stehbens<sup>1</sup> and Alpha S. Yap<sup>1,3</sup>

8

9 <sup>1</sup>Division of Cell and Developmental Biology, Institute for Molecular Bioscience, The  
10 University of Queensland; and

11 <sup>2</sup>QIMR Berghofer Medical Research Institute, Brisbane, Australia

12

13 <sup>3</sup>Correspondence: a.yap@uq.edu.au

14

15 **Keywords:** Epithelia, elongation, tubulogenesis, collagen I, symmetry breaking,  
16 anisotropy

17

18

19 **Abstract**

20

21 Epithelial networks are commonly generated by processes where multicellular  
22 aggregates elongate and branch. Here we focus on understanding cellular  
23 mechanisms for elongation, using an organotypic culture system as a model of  
24 mammary epithelial anlage. Isotropic cell aggregates broke symmetry and slowly  
25 elongated when transplanted into collagen 1 gels. The elongating regions of  
26 aggregates displayed enhanced cell proliferation that was necessary for elongation  
27 to occur. Strikingly, this loco-regional increase in cell proliferation occurred where  
28 collagen 1 fibrils reorganized into bundles which were polarized with the elongating  
29 aggregates. Applying external stretch as a cell-independent way to reorganize the  
30 ECM, we found that collagen polarization stimulated regional cell proliferation to  
31 precipitate symmetry-breaking and elongation. This required  $\beta$ 1-integrin and ERK  
32 signaling. We propose that collagen polarization supports epithelial anlagen  
33 elongation by stimulating loco-regional cell proliferation. This could provide a long-  
34 lasting structural memory of the initial axis that is generated when anlage break  
35 symmetry.

36

37 **Introduction**

38

39 Branched tubules represent one of the archetypal modes of epithelial organization  
40 (Iruela-Arispe and Beitel, 2013; Varner and Nelson, 2014). In organs such as the  
41 mammary gland and lungs, networks of hollow epithelial tubes mediate the  
42 physiological exchange of gases, nutrients and solutes between the body and its  
43 external environment (Chung and Andrew, 2008). These definitive networks are  
44 established by a complex morphogenetic process, where tubules grow outwards

45 from their precursors until they are instructed to branch, after which outgrowth  
46 continues until the network is completed (Affolter et al., 2009; Andrew and Ewald,  
47 2010). The branching and elongation of multicellular aggregates can thus be  
48 considered as fundamental processes in the generation of tubular networks.

49 Interestingly, different organs also use distinct strategies for tubulogenesis.  
50 For example, in the trachea, lumens appear early and accompany the growth of  
51 tubules (Schottenfeld et al., 2010), whereas in the salivary and mammary glands  
52 tubules first begin as non-polarized cellular aggregates (or anlage), which then  
53 elongate as solid, multicellular cords before eventually forming lumens (Bastidas-  
54 Ponce et al., 2017; Nerger and Nelson, 2018; Tucker, 2007). In the present study we  
55 use the mammary epithelium as a model to analyse what guides the elongation of  
56 multicellular anlage.

57 Tubulogenesis is a highly regulated phenomenon. The decision to branch is  
58 recognized to be a critical checkpoint that is controlled by developmental signals and  
59 cell-cell and cell-ECM interactions (Goodwin and Nelson, 2020). The elongation of  
60 tubule precursors is also thought to be a regulated process controlled by receptor  
61 tyrosine kinases and other signaling pathways (Costantini and Kopan, 2010;  
62 Gjorevski and Nelson, 2010; Sternlicht et al., 2006). However, elongation occurs  
63 over hours to days, time scales that are much longer than the underlying cellular  
64 processes and the signaling pathways that guide them. This raises the question of  
65 whether there may be mechanisms that can help guide elongation over longer time  
66 scales, effectively serving as a bridge between the rapidity of cell signaling and the  
67 slow progression of macroscopic anlage elongation. In this study, we show how  
68 collagen 1 within the extracellular matrix (ECM) can provide such a bridge by  
69 stimulating cell proliferation.

70 The ECM comprises complex mixtures of proteins, glycosaminoglycans and  
71 glycoconjugates that fill the extracellular spaces of tissues and organs (Frantz et al.,  
72 2010). One of the main components of ECM is collagen, particularly type 1 collagen  
73 (also called collagen 1), which is often the dominant form during epithelial  
74 tubulogenesis (Graham et al., 1988; Keely et al., 1995; Llacua et al., 2018; Nakanishi  
75 et al., 1986; Simon-Assmann et al., 1995). Type 1 collagen exerts a diverse range of  
76 effects that can potentially influence epithelial elongation. Fibrillar collagen helps  
77 scaffold other molecules, such other ECM proteins and growth factors (Kanematsu  
78 et al., 2004; Wipff and Hinz, 2008). Adhesion between cells and ECM allows the  
79 chemical and mechanical properties of the ECM to regulate cell signaling and gene  
80 regulation (Shi et al., 2011). These cell-ECM adhesions also allow cell-based forces  
81 to reorganize the ECM. In particular, cells can rearrange collagen fibrils to influence  
82 cell migration (Buchmann et al., 2021; Gjorevski et al., 2015; Guo et al., 2012; Shi et  
83 al., 2014).

84 Importantly, fibrillar components of the ECM, such as collagen 1, are relatively  
85 long-lived (Price and Spiro, 1977; Verzijl et al., 2000), making them attractive  
86 candidates to bridge time scales during the elongation process. Indeed,  
87 rearrangement of collagen has been implicated in patterning epithelial branching  
88 (Brownfield et al., 2013; Guo *et al.*, 2012; Harunaga et al., 2011; Ingman et al., 2006;

89 Patel et al., 2006). However, it is difficult to elucidate the specific contribution for  
90 collagen in the complex environment of an organ, where there are many additional  
91 contributions from other cell types and various chemotactic signals. Therefore, in this  
92 study we used three-dimensional (3D) organotypic cultures to test how the  
93 extracellular matrix (ECM) regulates epithelial elongation. We report that a collagen  
94 1 matrix induces the elongation of mammary epithelial anlage. This is accompanied  
95 by the polarization of the matrix itself, an event that sustains anlagen elongation by  
96 stimulating cell proliferation.

## 97 98 **Results**

### 99 100 **An experimental system to capture symmetry-breaking and elongation of** 101 **epithelial aggregates.**

102  
103 To model the elongation of epithelial anlage, we induced multicellular aggregates to  
104 break symmetry by manipulating the ECM environment in which the cells were  
105 grown. When MCF10A cells are grown on Matrigel™ substrates and in media  
106 supplemented with soluble Matrigel™ (Debnath et al., 2003), they proliferate from  
107 single isolated cells to form a multicellular aggregate, which then polarizes and  
108 clears the central mass of apoptotic cells, generating a central lumen in a process  
109 known as cavitation (Figure 1-figure supplement 1A). In contrast, when isolated cells  
110 were embedded in a gel of Type 1 collagen, which is the major ECM component in  
111 the stromal environment during mammary tubulogenesis (Schedin and Keely, 2011),  
112 they proliferated to form elongated, solid cords of non-polarized cells (Figure 1-figure  
113 supplement 1B) (Krause et al., 2008). This indicated that some properties of the  
114 collagen 1 environment might provide an instructive cue for elongation.

115 In order to capture the process by which isotropic aggregates broke symmetry  
116 and then elongated, cells were first seeded in Matrigel™ until proliferation arrested at  
117 10 days (Figure 1A); aggregates were then isolated and embedded into collagen 1  
118 (acid solubilized Rat Type I collagen, 37°C for 30 minutes). Lumens were apparent in  
119 some Matrigel-embedded aggregates, but most remained as solid spheres,  
120 resembling anlage. Live-cell imaging revealed that the transplanted aggregates  
121 displayed small jiggling motions for several hours, then spontaneously broke  
122 symmetry and elongated to form cord-like structures similar to those formed when  
123 cultured in collagen from the outset (Figure 1B and Video 1). These elongating  
124 aggregates were generally solid, with no evident lumens (Figure 2A). Commonly,  
125 elongation began with a group of cells that protruded away from the more spherical  
126 original aggregate (Figure 1C,E). In contrast, when aggregates were transplanted  
127 from Matrigel™ back into Matrigel™, they grew slightly but did not elongate (Figure  
128 1-figure supplement 1C). Therefore, transplantation into a collagen I matrix  
129 effectively caused isotropic MCF10A aggregates to break symmetry and elongate.

### 130 131 **Cell proliferation drives anlagen elongation.**

133 Multiple cellular processes have been implicated in epithelial elongation (Andrew and  
134 Ewald, 2010; Economou et al., 2013; Keller, 2002). We first examined cell  
135 proliferation, given the evident increase in the size of aggregates that elongated.  
136 Staining for Ki-67, a nonhistone nuclear protein commonly used as a marker of  
137 proliferating cells (Soliman and Yussif, 2016), showed clearly evident proliferation in  
138 aggregates that had elongated 8 d after transplantation into collagen (Figure 1C,D).  
139 These elongating aggregates commonly consisted of elongated extensions as well  
140 as a rounded region that marked the original aggregate (Figure 1B). Strikingly, Ki-67-  
141 positive cells were more frequent in the elongating parts of the aggregates ( $41.00 \pm$   
142  $4.55$  % of all cells) compared with the non-elongating parts of the aggregates ( $18.86$   
143  $\pm 3.05$  %) (Figure 1C,D). Live-cell imaging of cells expressing NLS-mCherry also  
144 showed that the proportion of nuclei which divided was higher in the elongating than  
145 the non-elongating areas within aggregates (Figure 1E,F). Thus, elongation was  
146 associated with loco-regional differences in cell proliferation, which was enhanced in  
147 those parts of the aggregates that elongated.

148 More detailed inspection revealed that increased proliferation was first evident  
149 in aggregates two days after transplantation (Figure 1G) and appeared to precede  
150 the onset of symmetry-breaking (Figure 1H). To quantitate aggregate elongation we  
151 calculated a symmetry ratio, i.e., the ratio of the maximum length ( $L_1$ ) and width ( $L_2$ )  
152 of the aggregates. Completely round aggregates will have a symmetry ratio of 1,  
153 whereas for elongated aggregates  $L_1/L_2$  will be  $>1$  (Figure 2B). The symmetry ratio  
154 first increased at Day 3 (Figure 1H), approximately 24 h after an increase in  
155 proliferation was detected (Figure 1G). To test if any loco-regional differences in  
156 proliferation were to be found at these early stages of symmetry breaking, we  
157 analysed aggregates that had broken symmetry (defined experimentally as a  
158 symmetry ratio  $> 1.5$ ) after 3 days of culture. We compared the proportion of cells  
159 that were Ki67-positive in the elongating regions of aggregates with the proportion to  
160 be found in the non-elongating areas of the same aggregates (Figure 1I). Ki67  
161 positivity was two-fold greater in the elongating areas (Figure 1I), suggesting that  
162 loco-regional differences in proliferation were established early in the elongation  
163 process.

164 Importantly, elongation was inhibited when proliferation was blocked using the  
165 cell cycle inhibitors mitomycin C and aphidicolin (Figure 1J). In control cultures the  
166 proportion of Ki-67-positive cells increased progressively after transplantation into  
167 collagen (from  $2.28 \pm 0.85$  % at Day 1 to  $26.63 \pm 3.34$  % at Day 8). However, cell  
168 proliferation was significantly reduced by mitomycin C ( $3.88 \pm 1.18$  %, Day 8) and  
169 aphidicolin ( $11.54 \pm 3.55$  %, Day 8) (Figure 1K). Aggregate elongation was also  
170 significantly reduced by both mitotic inhibitors (Figure 1J). Whereas the symmetry  
171 ratio increased as control anlage elongated, this was blocked by both mitomycin C  
172 and aphidicolin (Figure 1L). Formally, cell proliferation might have been necessary to  
173 initiate symmetry-breaking and cell elongation or ongoing proliferation might also  
174 have served to sustain elongation. To pursue this, we added mitomycin C or  
175 aphidicolin after the first signs of symmetry breaking were evident (at 3 days after  
176 transplantation). This reduced elongation by  $\sim 3$ -fold (Figure 1M). Therefore, cell



177 proliferation was required for elongation, with the capacity to contribute early in the  
178 symmetry-breaking process and also later to sustain elongation.

179 We then used live cell imaging of labelled nuclei to evaluate other processes  
180 implicated in epithelial elongation. Cells within the elongating regions tended to  
181 divide along the axis of elongation (Figure 1-figure supplement 2A), as revealed by  
182 comparing the axis of cell division and the principal axis of the region. The angle  
183 difference between these axes was smaller in elongating areas compared with non-  
184 elongating areas within the same aggregate (Figure 1-figure supplement 2A). This  
185 suggested that polarized cell division accompanied enhanced proliferation during  
186 aggregate elongation (Gong et al., 2004; Keller, 2006).

187 Tracking also revealed that cells were motile within elongating aggregates  
188 (Figure 1-figure supplement 2B). This was evident in rounded aggregates that had  
189 not broken symmetry and as well as in aggregates that had elongated (Figure 1-  
190 figure supplement 2C). When we examined regional differences within aggregates  
191 that had undergone elongation, we found that the speeds of migration were identical  
192 in the parts that were elongating, compared with the non-elongating regions of the  
193 aggregates (Figure 1-figure supplement 2D). However, the straightness of the tracks,  
194 used an index of the persistence of migration, was slightly greater in the elongating  
195 areas than in the non-elongating areas (Figure 1-figure supplement 2E). Furthermore,  
196 cells within regions of elongation appeared to orient better with the axis of the  
197 aggregate than did cells found in non-elongating areas. We measured this by  
198 comparing the orientation of the tracks with the principal axis of the aggregates  
199 (track displacement angle, Figure 1-figure supplement 2F). The track displacement  
200 angle was less in the elongating areas than in the non-elongating areas.

201 Inhibition of proliferation with either mitomycin C or aphidicolin did not affect  
202 cell migration speeds, in either the rounded or elongated areas (Figure 1-figure  
203 supplement 2C). However, blocking proliferation slightly reduced track straightness,  
204 implying a reduction in persistence (Figure 1-figure supplement 2G) and increased  
205 the track displacement angle (Figure 1-figure supplement 2H). Therefore, the  
206 apparently orderly migration of cells was compromised by blocking cell proliferation.  
207 Together, these results suggest that proliferation was essential for the elongation  
208 process and may also have influenced aspects of directional migration that would be  
209 predicted to reinforce the elongation process.

210

### 211 **Collagen I condenses around epithelial aggregates that break symmetry.**

212

213 To gain further insight into the process of elongation, we sought to identify changes  
214 in the ECM during this process. Consistent with the change in matrix environment  
215 associated with the transplantation process, re-embedded aggregates lost laminin V  
216 expression over time (Figure 2-figure supplement 1A). They expressed fibronectin  
217 throughout the experiments without any evident regional differences in the  
218 elongating areas of aggregates (Figure 2-figure supplement 1B).

219 Then we visualized Collagen 1 by labelling with the collagen-binding peptide  
220 CNA35 (mCherry-CNA35; (Krahn et al., 2006)), mixed with soluble Collagen I before

221 the incorporation of MCF10A aggregates (Figure 2A). Collagen I, in contrast to the  
222 basement membrane-like Matrigel<sup>TM</sup>, is composed of fibrillar polymers that can guide  
223 cell movement and whose organization is influenced by the application of cellular  
224 forces (Brownfield *et al.*, 2013; Gjorevski *et al.*, 2015; Piotrowski-Daspit *et al.*, 2017).  
225 Aggregate elongation appeared to coincide with change in fibril organization.  
226 Whereas fibrils appeared isotropic in acellular gels, collagen condensed around the  
227 aggregates that had begun to elongate, forming dense bands that extended away  
228 from the cells into the gel. However, it was seldom possible to visualize individual  
229 fibrils with the low magnification, long working distance lenses that were required to  
230 visualize aggregates within the gels.

231 Therefore, we measured the coherency (or co-orientation) of gels with  
232 Orientation J, which calculates the local orientation and isotropy for each pixel in an  
233 image based on the structure tensor for that pixel (see Methods for  
234 details;(Rezakhaniha *et al.*, 2012)). We interpret coherency as reflecting collagen  
235 bundling and condensation (which we shall call “bundling” for short), such as has  
236 been observed elsewhere during elongation (Brownfield *et al.*, 2013; Buchmann *et al.*,  
237 2021; Gjorevski *et al.*, 2015). Then, we compared collagen coherency with  
238 aggregate shape, as measured by the symmetry ratio (Figure 2B), after 8 days  
239 culture, when elongation was established. Overall, collagen coherency increased  
240 with the increase in symmetry ratio (Figure 2C), implying that the degree of collagen  
241 bundling increased with aggregate elongation. Furthermore, closer examination  
242 around elongating aggregates showed that collagen coherency was greater in  
243 regions proximate to the elongating parts of the aggregates compared with the non-  
244 elongating parts (Figure 2D). In contrast, aggregates that remained spherical  
245 showed no regional differences in collagen organization. Similarly, earlier studies  
246 showed that collagen reorganized ahead of the tips of elongating aggregates  
247 (Brownfield *et al.*, 2013; Gjorevski *et al.*, 2015). This suggested that collagen  
248 became increasingly bundled and condensed where aggregates were elongating.

249 Increased collagen bundling was also evident at the early stages of elongation.  
250 Because aggregates varied in the timing of when they broke symmetry, we  
251 examined aggregates by live imaging in the first 3 days of the assays. We then  
252 subdivided these based on their symmetry ratio, and compared the coherency of  
253 collagen 1 around the elongating areas of aggregates with that around the non-  
254 elongating areas (i.e. those that remained rounded, expressed as a fold-difference).  
255 This showed that collagen 1 coherency increased around the elongating areas as  
256 they broke symmetry (Figure 2E). Thus, from the early stages of symmetry breaking  
257 collagen 1 bundling increased around the sites where aggregates elongated.

258 Collagen bundling required cell proliferation, as coherency was reduced by  
259 treatment with either mitomycin C or aphidicolin (Figure 2F,G). Collagen bundling  
260 was also reduced when we inhibited cellular contractility with the myosin antagonist,  
261 blebbistatin, or the Rho kinase (ROCK) inhibitor, Y27632 (Figure 2H,I), consistent  
262 with reports that cell contractility can condense collagen (Brownfield *et al.*, 2013;  
263 Buchmann *et al.*, 2021; Gjorevski *et al.*, 2015). In contrast, collagen condensation  
264 persisted around aggregates treated with the Rac1 GEF inhibitor NSC23766, which

265 did not affect aggregate elongation or the speed with which cells moved within the  
266 aggregates (Figure 2-figure supplement 2). This suggested that aggregates exerted  
267 forces to reorganize their local collagen environment as they broke symmetry.

268

### 269 **Collagen polarity coaligns with cell aggregates during elongation.**

270

271 We then asked if higher order organization in the collagen 1 gels was altered as  
272 aggregates elongated. For this, we used Orientation J to extract the principal axis of  
273 orientation in the gel, as a measure of its polarity, around elongating or non-  
274 elongating parts of an aggregate. Then we compared these gel orientations with the  
275 axis of elongation of the cell aggregate. First, we assembled histograms of gel  
276 orientation, setting the principal axis of elongation in the whole aggregate as  $0^\circ$   
277 (Figure 2J). The gels around non-elongating areas of the aggregates showed a  
278 broad distribution of orientations relative to the axis of the aggregate (Figure 2J). In  
279 contrast, the gel around the elongating regions of aggregates tended to orient with  
280 the principal axis of the aggregates. This suggested that the gel preferentially co-  
281 aligned with the aggregates around the regions of elongation. This notion was  
282 reinforced by comparing the angle differences between the principal axis (polarity) of  
283 the gel and of the aggregates. In this analysis, a decrease in the difference in angles  
284 between these two axes indicates an increase in their co-alignment. We found that  
285 the angle differences between the axes of collagen polarity and aggregate  
286 elongation was significantly smaller around the elongating regions than around the  
287 non-elongating regions of the aggregates (Figure 2K). Thus, the collagen matrix  
288 became polarized and co-aligned with the aggregates around regions of elongation.

289

### 290 **Collagen polarization stimulates cell proliferation to induce aggregate** 291 **elongation.**

292

293 This led us to wonder if polarization of the collagen could itself influence the process  
294 of aggregate elongation. To test this, we developed a strategy that applied  
295 exogenous stretch to polarize the matrix independently of cell-generated forces. In  
296 this protocol, a collagen gel was created within a ring-shaped polydimethylsiloxane  
297 (PDMS) frame, then stretched uniaxially by expanding a stretcher inserted into the  
298 hole of the ring for 4 h (Figure 3-figure supplement 1A,B). Second harmonic imaging  
299 confirmed that collagen fibers were isotropically distributed in the unstretched gels  
300 and became more coherent (bundled) and more polarized immediately after  
301 stretching (Figure 3-figure supplement 1C,D), with their principal axes oriented in the  
302 direction of stretch (Figure 3-figure supplement 1E). Moreover, polarization of the  
303 collagen fibrils could be preserved for at least 7 days after the application of stretch  
304 by re-embedding the collagen rings in a larger collagen gel (Figure 3A-C, Figure 3-  
305 figure supplement 1B). In contrast, when gels were allowed to float in medium after  
306 stretching (Figure 3D, Figure 3-figure supplement 1B), gel coherency (Figure 3E)  
307 and polarity (Figure 3F) reverted to that of unstretched gels. Thus, reembedding

308 allowed us to sustain collagen polarization for a prolonged period after the initial  
309 stretching.

310 We then transplanted spherical cell aggregates from Matrigel™ into the  
311 collagen rings and applied our stretching protocol. Interestingly, the aggregates did  
312 not become elongated during the period when stretch was actively applied. The  
313 symmetry ratios of aggregates immediately after stretching were identical to those in  
314 unstretched aggregates (Figure 3-figure supplement 2A,B). Instead, aggregates  
315 broke symmetry many hours after the period of active stretching. However,  
316 symmetry breaking occurred earlier when stretched gels were allowed to retain  
317 collagen polarization by re-embedding ( $35.14 \pm 3.28$  h, Figure 3G,H) compared with  
318 aggregates that were allowed to break symmetry spontaneously in non-stretched  
319 gels ( $68.40 \pm 5.88$  h,  $p < 0.001$ ). Moreover, the degree of elongation was also  
320 enhanced once it had begun. The symmetry ratios of aggregates embedded in  
321 stretch-polarized gels were significantly greater than those seen with native gels  
322 (Figure 3I). Therefore, polarization of the collagen gel could stimulate the cell  
323 aggregates to break symmetry.

324 Stretch-polarized aggregates also elongated preferentially along the axis of  
325 the exogenous stretch, whereas aggregates in non-stretched gels elongated in a  
326 random direction (Figure 3G,J, Figure 3-figure supplement 2C,D; Video 2). The  
327 angle difference between collagen fiber polarity and aggregate elongation was  
328 significantly smaller in stretch-polarized gels than in unstretched control gels (Figure  
329 3K). Of note, collagen gel reorganization was preserved in the stretch-polarized gels  
330 (Figure 3L,M), even in the presence of cellular aggregates, and this was oriented in  
331 the direction of the original stretch. This suggested that in this assay the elongating  
332 aggregates were following the polarity of the gel itself. In contrast, similar intensity of  
333 fibronectin staining was seen in stretch-polarized aggregates compared with controls,  
334 suggesting that fibronectin deposition was not stimulated by the stretch stimulation  
335 (Figure 3-figure supplement 2E).

336 Importantly, the impact of stretch on the aggregates was disrupted when  
337 collagen polarization was reversed. The proportion of aggregates that elongated  
338 after stretching was reduced when the gels were floated rather than being  
339 reembedded (Figure 4A) and their length of elongation was reduced (Figure 4B). Of  
340 note, cell-based forces could not overcome the external forces acting on the gel as  
341 the reversal of collagen polarization occurred even when aggregates were  
342 incorporated into the gel (Figure 4C). This implied that collagen polarization may  
343 have been responsible for allowing external stretch to promote aggregate elongation.

344 To confirm that these results were due to a critical role of collagen polarization,  
345 rather than as-yet-unknown impacts of stretch upon the cells, we used collagenase  
346 to extract aggregates from gels immediately after their 4 h stretch, then transplanted  
347 them into unstretched gels where the collagen fibers oriented randomly (Figure 4D).  
348 We reasoned that if elongation were due to a cell-intrinsic mechanism that bore the  
349 memory of the stretch, then this should be preserved even after cells were  
350 transplanted into a naïve gel. As noted earlier, aggregate elongation occurred earlier  
351 when stretched gels were reembedded. However, this effect was lost when cells

352 were removed from the stretched gel immediately after stretching and transplanted  
353 into a naïve isotropic gel (Figure 4E). Together, these results indicate that collagen  
354 polarization can direct aggregate elongation, to accelerate its initiation and orient the  
355 direction of symmetry-breaking.

356

### 357 **Collagen matrix polarization stimulates cell proliferation for anlagen** 358 **elongation.**

359

360 Since cell proliferation was a major driver of spontaneous aggregate elongation, we  
361 then asked if it was altered when the collagen gel was polarized by stretch. Indeed,  
362 we found that stretch-polarization stimulated cell proliferation (Figure 5A). An  
363 increase in the proportion of Ki67-positive cells was evident at day 1 after stretch-  
364 polarization, whereas it did not increase till day 2 in native gels. Moreover, the  
365 proportion of Ki-67 cells was consistently greater in stretch-polarized gels during the  
366 early phase of culture (day 1-3) as well as at the end of our experiments (day 8). Cell  
367 proliferation mediated the enhanced elongation in the stretched gels, as both the  
368 length (Figure 5B) and symmetry ratio (Figure 5C) of stretch-stimulated aggregates  
369 were reduced by mitomycin C and aphidicolin.

370

371 However, proliferation was not increased if gels were allowed to float, rather  
372 than being re-embedded, after stretching. Floating the gels reduced the proportion of  
373 proliferating cells in the aggregates overall (Figure 5D,E) as well as those specifically  
374 within the area of elongation (Figure 5F), compared with gels that had been re-  
375 embedded to preserve collagen polarization. This implied that it was sustained  
376 polarization of the gel, rather than simply transfer into the collagen environment, that  
377 could stimulate cell proliferation to elongate aggregates.

377

### 378 **Polarized collagen promotes cell proliferation via ERK pathway.**

379

380 Extracellular signal-regulated kinase (ERK1/2) is one of the major pathways that  
381 stimulates cell proliferation in mammary epithelial cells (Moreno-Layseca and Streuli,  
382 2014; Streuli and Akhtar, 2009; Walker and Assoian, 2005). To evaluate its possible  
383 role in aggregate elongation, we expressed the ERK/KTR-mClover biosensor, which  
384 translocates out of the nucleus when ERK is activated (de la Cova et al., 2017). We  
385 confirmed the action of the sensor, as it accumulated in the nuclei of monolayer  
386 cultures that were treated with the ERK inhibitor FR180204 (50  $\mu$ M) (Figure 6-figure  
387 supplement 1A). Using this sensor in 3D cultures, we found that the proportion of  
388 ERK-activated cells was significantly greater in the elongating regions of aggregates  
389 that had spontaneously broken symmetry, than in the non-elongating areas (Figure  
390 6A, B). This was especially apparent in cells at the surface of aggregates that were  
391 in contact with the collagen gel (Figure 6C). In contrast, although Hippo pathway  
392 signaling has been implicated in breaking the symmetry of epithelial organoids  
393 (Serra et al., 2019), we did not detect any changes in nuclear Yap1 staining that  
394 might indicate that this pathway was being activated in our experiments (Figure 6-



395 figure supplement 1B,C). This suggested that ERK 1/2 signaling might be a  
396 candidate for collagen polarization to stimulate cell proliferation.

397 This notion was supported by finding that FR180204 (50  $\mu$ M) reduced cell  
398 proliferation in response to stretch-polarization (Figure 6D,E) and decreased the  
399 proportion of aggregates that elongated (Figure 6F). As well, the length (Figure 6G)  
400 and asymmetric morphology (Figure 6H) were reduced in those aggregates that did  
401 elongate. Thus, ERK1/2 appeared to be critical for collagen polarization to stimulate  
402 cell proliferation for aggregate elongation.

403

#### 404 **Integrins are necessary for polarized collagen to stimulate elongation.**

405

406 Integrins are the major ECM receptors in the mammary gland and other epithelia,  
407 and they control diverse aspects of cellular function, including cell proliferation  
408 (Miranti and Brugge, 2002; Wozniak et al., 2003). We therefore asked if integrin  
409 signaling might have stimulated cell proliferation and aggregate elongation in  
410 response to collagen polarization (Figure 7A).

411 We focused on the  $\beta$ 1-integrins which have been implicated in regulating cell  
412 proliferation during mammary gland development (Li et al., 2005). This class of  
413 integrins contains a number of collagen 1 receptors, including  $\alpha$ 2 $\beta$ 1-integrin (Heino,  
414 2000; Käpylä et al., 2000) which was expressed in our MCF10A cells (Figure 7B).  
415 Then we used the inhibitory AIB2 antibody to block  $\beta$ 1-integrin during stretch-  
416 polarization experiments. mAb AIB2 (15  $\mu$ g/ml) was added as aggregates were  
417 transplanted into the collagen gel rings and replenished after 7 days. mAb AIB2  
418 blocked the induction of proliferation in stretch-polarized gels, the proportion of Ki67-  
419 positive cells being significantly reduced in AIB2-treated cultures compared with  
420 controls (Figure 7C,D). This was accompanied by inhibition of elongation. After 3  
421 days incubation,  $49.19 \pm 1.61$  % aggregates started to elongate in controls, whereas  
422 less than 20 % of aggregates elongated when  $\beta$ 1-integrins were inhibited (AIB2:  
423  $17.86 \pm 4.78$  %) (Figure 7E). Moreover, even when mAb AIB2-treated aggregates  
424 eventually elongated upon prolonged culture (comparing the proportion of elongated  
425 cells at 7 days with that at 3 days), these aggregates remained shorter (Figure 7F)  
426 and less asymmetric (Figure 7G) than in the absence of AIB2. Finally, we asked if  
427 the ERK response required  $\beta$ 1-integrins. Indeed, we found that the ability of stretch-  
428 polarization to stimulate ERK signaling at early (day 2) and later stages (day 7) was  
429 reduced when  $\beta$ 1-integrins were blocked with mAb AIB2 (Figure 7H,I). This implied  
430 that a  $\beta$ 1-integrin-ERK pathway was responsible for stimulating epithelial  
431 proliferation.

432

#### 433 **Discussion**

434

435 These results lead us to conclude that a polarized collagen 1 matrix can promote  
436 epithelial elongation by stimulating locoregional cell proliferation. We infer this  
437 because: 1) Loco-regional cell proliferation was a striking feature of MCF10A  
438 elongation in our experiments, whose loss was not compensated for by other

439 morphogenetic processes. 2) The pattern of proliferation within aggregates was  
440 critically influenced by the polarized organization of the surrounding collagen 1  
441 matrix. Together, we suggest that these reveal an interplay between collagen  
442 polarization and cell proliferation that can guide epithelial elongation (Figure 8).

443 Cell proliferation was a distinguishing feature of the elongation process in our  
444 MCF10A model. Increased proliferation was observed in elongating aggregates and,  
445 indeed, began to increase before elongation was detected. Furthermore, proliferation  
446 was greater in the regions of the aggregates that underwent elongation compared to  
447 those areas that did not. This suggested that a loco-regional increase in cell  
448 proliferation might be important for the elongation process, a notion that was  
449 supported when elongation was inhibited by blocking proliferation. Elongation was  
450 reduced when mitomycin C and aphidicolin were added from the beginning of the  
451 assays, consistent with earlier evidence that inhibiting proliferation early in the  
452 culture process blocked branching morphogenesis in mouse mammary organoids  
453 (Ewald *et al.*, 2008). We also found that elongation was compromised if proliferation  
454 was inhibited after the elongation process had begun, a later dependence that was  
455 not seen in organoids (Huebner *et al.*, 2016). Differences in cell system may  
456 therefore influence the impact of cell proliferation on elongation. Nonetheless, our  
457 data strongly suggest that loco-regional stimulation of cell proliferation was required  
458 for epithelial elongation in our model.

459 This raised the question of how cell proliferation might be preferentially  
460 increased within specific regions of MCF10A aggregates. Several of our  
461 observations implicate polarized reorganization of the collagen 1 matrix in this  
462 specification process. First, loco-regional polarization of the collagen 1 matrix  
463 accompanied aggregate elongation when cell aggregates spontaneously broke  
464 symmetry. This reorganization was distinguished by increased coherency of the  
465 matrix, consistent with an increase in collagen bundling, as well as polarization of the  
466 gel so that it became oriented with the axis of the elongating aggregate. Matrix  
467 reorganization concentrated where the aggregates were elongating and proliferation,  
468 as has been reported earlier (Brownfield *et al.*, 2013; Buchmann *et al.*, 2021;  
469 Gjorevski *et al.*, 2015). Second, aggregate elongation was stimulated when the gel  
470 was polarized by applying an external stretch. Similarly, collagen 1 orientation has  
471 been reported to mammary organoid branching (Brownfield *et al.*, 2013). But the  
472 stimulatory effect on elongation was lost if the stretched gels were allowed to lose  
473 their polarization or if aggregates were transplanted into a naïve, unstretched gel.  
474 This implied that the cells were responding to the altered organization of the gel,  
475 rather than simply exposure to collagen 1. Consistent with what we had observed  
476 when aggregates spontaneously broke symmetry, stretch-induced polarization of  
477 gels stimulated cell proliferation and this was necessary for the accelerated  
478 elongation process to occur. This appeared to be mediated by a  $\beta$ 1-integrin and  
479 ERK-dependent pathway.

480 What property of the polarized collagen 1 was being recognized by the cells to  
481 enhance their proliferation? The polarization of collagen networks can have complex  
482 effects on cells. Increasing fibril alignment in acellular collagen gels was reported to

483 increase fibre stiffness and decrease pore size (Riching et al., 2014; Taufalele et al.,  
484 2019), even in the absence of externally applied forces. Moreover, in single cell  
485 cultures aligned collagen fibres were associated with larger focal adhesions than  
486 non-aligned fibrils (Doyle and Yamada, 2016). One possibility, then, is that integrin  
487 signaling was responding to the increased stiffness of the polarized collagen gels.  
488 This is consistent with the well-characterized role for integrins to sense changes in  
489 matrix stiffness (Giannone and Sheetz, 2006). As well, collagen 1 can bind to, and  
490 sequester, a variety of growth factors. Whether this reservoir can be released when  
491 cells apply tension to collagen is an interesting question for further consideration  
492 (Wipff and Hinz, 2008).

493 Cell migration is a key driver of branching morphogenesis (Gjorevski *et al.*,  
494 2015; Huebner *et al.*, 2016) and earlier experiments reported that the application of  
495 external stretch to collagen-embedded aggregates could promote elongation through  
496 cell migration (Brownfield *et al.*, 2013). We, too, observed cell migration in our  
497 aggregates and, although their speeds were not different, migrating cells within  
498 elongating parts of the aggregates tended to align with the axis of elongation and  
499 move slightly more persistently than cells moving within the non-elongating regions  
500 of the aggregates. These features of collective migration might be expected to  
501 contribute to aggregate elongation.

502 Interestingly, blocking cell proliferation decreased the apparent persistence of  
503 the migrating cells and their alignment with the principal axes of the aggregates.  
504 Therefore, rather than collective migration being enhanced to compensate for the  
505 decrease in proliferation, cell proliferation appeared to support these elongation-  
506 facilitating aspects of cell migration. One possible explanation is that persistence and  
507 directional alignment were being guided by the reorganized collagen which, in effect,  
508 served to create a 3-dimensional micropattern around the aggregates. Studies in 2-  
509 dimensional systems have shown that cells can orient their patterns of migration  
510 when collagen networks condense and form bundles (Mohammed et al., 2020; Wang  
511 et al., 2018). As collagen reorganization was reduced by inhibiting proliferation,  
512 mitomycin C and aphidicolin might have affected cell migration indirectly through  
513 matrix organization. Such micropatterning might also influence other aspects of cell  
514 behaviour during elongation. Micropatterning experiments using 2-dimensional  
515 substrata have shown that anisotropic confinement can orient patterns of cell division  
516 (They et al., 2005), potentially by orienting tensile stresses (Campinho et al., 2013;  
517 Legoff et al., 2013), as would also be predicted to accompany stiffer, condensed  
518 collagen bundles. Consistent with this, we observed that cells within the elongating  
519 areas appeared to orient their divisions with the axis of elongation, an effect which  
520 would also be predicted to enhance elongation. These observations reinforce the  
521 notion that interplay between cell proliferation and collagen (re)organization is a key  
522 contributor to epithelial elongation.

523 The reductionist model that we used in these experiments allowed us to focus  
524 on testing how collagen organization could promote epithelial elongation. How might  
525 the results from this system operate in the more complex environment of the tissue?  
526 One important factor to consider is the basement membrane, which can separate the

527 epithelial cell compartment from collagen 1 in the stroma. However, earlier studies  
528 reported that the basement membrane thins substantially and is remodelled in  
529 regions of epithelial elongation, such as the tips of mammary or salivary gland buds  
530 (Harunaga et al., 2014; Silberstein and Daniel, 1982; Williams and Daniel, 1983),  
531 potentially allowing elongating regions of epithelia to engage with collagen 1.  
532 Evaluating how cell proliferation, stromal collagen organization are coordinated with  
533 other components of the ECM in physiological models of developing glands will be  
534 an important question for future research.

535 In conclusion, we propose the following working model (Figure 8): Regional  
536 polarization of the collagen 1 matrix begins in response to anisotropies in force that  
537 aggregates exert upon their ECM via their integrin adhesions (Figure 7A). Cell-based  
538 forces exerted through integrins can apply strain on collagen fibrils (Brownfield *et al.*,  
539 2013; Buchmann *et al.*, 2021; Gjorevski *et al.*, 2015; Hall et al., 2016) and, consistent  
540 with this, collagen reorganization in our experiments was compromised by inhibiting  
541 cellular contractility. However, compression of collagen by increasing cell numbers or  
542 cell movements could also have contributed (Buchmann *et al.*, 2021). By implication,  
543 collagen polarization will be greater around the parts of the aggregate that are  
544 generating more force. The consequent loco-regional collagen polarization then  
545 stimulates further cell proliferation in the adjacent parts of the aggregate to sustain  
546 elongation. It was interesting to note that collagen reorganization was compromised  
547 when cell proliferation was blocked from the outset of the assays. Possibly, subtle  
548 differences in cell proliferation may have contributed to generating initial anisotropies  
549 in force to reorganize the gels. If so, we speculate that the increase in cell  
550 proliferation may have contributed to further collagen reorganization, with the  
551 capacity to develop a feedback system that might help sustain aggregate elongation.  
552 This would allow polarized collagen networks to effectively provide a structural  
553 memory of the initial axis of symmetry breaking, i.e., a relatively long-lived spatial  
554 cue that directs further elongation of the epithelial anlagen.

555

556

## 557 **Acknowledgements**

558

559 We thank Selwin Wu for advice and all our lab colleagues for their feedback and  
560 support. The authors were supported by the National Health and Medical Research  
561 Council of Australia (Fellowship 1136592 and GNT1123816, 1140090 to ASY),  
562 Australian Research Council (DP19010287, 190102230 to AY and FT190100516 to  
563 SS), a Snow Medical Fellowship to JH, and a postdoctoral fellowship from The  
564 Uehara Memorial Foundation to HK.

565

566

## 567 **Materials and Methods**

568

### 569 ***Cell culture and lentivirus infection***

570 MCF10A human mammary epithelial cells were cultured in DMEM/F12 medium  
571 supplemented with 5% horse serum, 10 µg/ml insulin, 0.5 µg/ml hydrocortisone, 100

572 ng/ml cholera toxin, 20 ng/ml EGF, 100 units/ml Penicillin and 100 units/ml  
573 Streptomycin as previously described (Debnath et al., 2002).  
574 HEK-293T cells were transfected using Lipofectamine 2000 (Invitrogen) for lentiviral  
575 expression vector pLL5.0 and third generation packaging constructs pMDLg/pRRE,  
576 RSV-Rev and pMD.G. Third generation packaging constructs were kindly provided  
577 by Prof. James Bear (UNC Chapel Hill, North Carolina, USA). After transducing  
578 MCF10A cells with either pLL5.0-EGFP-HRasC20, pLL5.0-NLS-mCherry or pLenti-  
579 ERK/KTR-mClover lentivirus construct, we isolated highly-expressing cells using  
580 Fluorescence-activated cell sorting (Influx Cell sorter; Cytospeia).

581

### 582 **3D Matrigel and collagen culture**

583 MCF10A aggregates and acini were cultured on 100% growth factor reduced  
584 Matrigel (FAL354230; Corning) and overlaid with Matrigel including medium in 8  
585 well chamber coverglass (0030742036; Eppendorf) as previously described  
586 (Debnath *et al.*, 2002; Debnath *et al.*, 2003). In brief, single isolated MCF10A cells  
587 were mixed with an assay medium containing 2% Matrigel, 5 ng/ml EGF and seeded  
588 on a solidified layer of 100% Matrigel at 10000 cells/well. After seeding cells on  
589 Matrigel, medium was changed every 4 days.

590 In collagen culture, single isolated MCF10A cells were mixed with collagen gel at  
591 20000 cells/well (FAL354236; Corning). This mixture was neutralized with NaOH and  
592 HEPES buffer and collagen concentration was adjusted to 1.0 mg/ml with culture  
593 medium on ice. The pH of collagen solution was checked by litmus paper. Collagen  
594 solution with cells was seeded in 8 well chamber coverglass and solidified at 37 °C  
595 for 30 min.

596

### 597 **Transplantation of MCF10A aggregates**

598 MCF10A aggregates cultured on Matrigel for 10 days were washed with PBS and  
599 incubated with cold cell recovery solution (FAL354253; Corning) for 30 min on ice.  
600 Aggregates were collected into a tube containing the cell recovery solution, spun  
601 down at 1200 rpm, and washed with cold PBS. PBS-washed aggregates were  
602 resuspended in MCF10A culture medium and mixed with collagen solution  
603 neutralized with NaOH and HEPES buffer. Collagen gel solution with aggregates  
604 were solidified at 37 °C for 30 min.

605 Aggregates embedded in collagen gel were isolated from gel by dissolving the gel  
606 with collagenase (C2799; Sigma). Gels were washed with PBS and incubated in 20  
607 µg/ml collagenase in Hanks' Balanced Salt Solution (H8264; Sigma) at 37 °C for 30  
608 min to dissolve the collagen gel. Aggregates were collected with incubated solution  
609 into the tube and mixed with DMEM/F12 medium which contains 20% horse serum.  
610 Solution was spun down at 1200 rpm and pellet was washed with PBS. PBS-washed  
611 aggregates were resuspended in culture medium and re-embedded in collagen gel.

612

### 613 **Plasmids**

614 pLL5.0-NLS-mCherry was constructed in previous study (Leerberg et al., 2014).  
615 pLent-ERK/KTR-mClover was obtained from addgene (#59150). pLL5.0-EGFP-  
616 HRasC20 was generated by insertion of EGFP-HRasC20 fragment which was  
617 amplified from pEGFP-F (#6074-1; Clontech) by PCR into pLL5.0 vector. pLL5.0-  
618 EGFP (gift from Prof. James Bear; UNC Chapel Hill, North Carolina, USA) was  
619 digested with EcoRI and SbfI to remove EGFP, and then EGFP-C20 fragment was  
620 inserted and ligated by In-Fusion cloning kit (638910; Clontech).

621



## 622 ***Antibodies and inhibitors***

623 Primary antibodies used for immunocytochemistry in this study were rabbit anti-Ki67  
624 (ab15580; Abcam), mouse anti-laminin V (MAB19562; Chemicon), rat anti-E-  
625 cadherin (131900; Invitrogen), mouse anti-GM130 (610822; BD), rabbit anti-  
626 fibronectin (F3648; Sigma) and rabbit anti-YAP1 (4912; Cell Signaling Technology).  
627 F-actin was stained with AlexaFluor 488-, 594-, 647-phalloidin (Invitrogen). Primary  
628 antibodies used for immunoblot were rabbit anti-integrin  $\alpha 2$  (ab181548; Abcam),  
629 mouse anti-integrin  $\beta 1$  (610467; BD Transduction Laboratories) and rabbit anti-  
630 p44/42 MAPK (Erk1/2) (9102; Cell Signaling Technology). AIB2 antibody for  
631 blocking integrin  $\beta 1$  was purchased from Developmental Studies Hybridoma Bank  
632 and treated at 15  $\mu\text{g}/\text{ml}$  in this study.

633 Proliferation inhibitors mitomycin C (M7949; Sigma) and aphidicolin (178273; Merck)  
634 were used at 10  $\mu\text{M}$  and 2  $\mu\text{M}$  respectively. Myosin II inhibitor blebbistatin (203390;  
635 Sigma) and ROCK inhibitor Y-27632 (688000; Sigma) were used at 25  $\mu\text{M}$  and 30  
636  $\mu\text{M}$  respectively. ERK1/2 inhibitor FR180204 (SC-203945; Santa Cruz) was used at  
637 50  $\mu\text{M}$ . Except for mitomycin C, cell aggregates were treated with the inhibitors after  
638 transplantation into collagen gels. Inhibitors were then replenished when medium  
639 was changed and left in the collagen culture until cell aggregates were ready to be  
640 fixed. For mitomycin C wash out experiments, cell aggregates were treated with  
641 mitomycin C for 1 hour, then washed 3 times with PBS and left to recover in  
642 MCF10A culture medium.

643

## 644 ***Immunocytochemistry and microscopy***

645 3D cultured cells in gel were fixed with 4% paraformaldehyde in cytoskeleton  
646 stabilization buffer (10mM PIPES at pH 6.8, 100mM KCl, 300 mM sucrose, 2 mM  
647 EGTA and 2 mM  $\text{MgCl}_2$ ) at room temperature for 30 min, followed by a treatment for  
648 30 min with 0.5% TritonX-100 and 10% goat serum in PBS for 1 hour at room  
649 temperature. Then they were stained with primary antibodies for overnight at 4  $^{\circ}\text{C}$ .  
650 Subsequently, cells were washed with PBS and incubated with secondary antibodies  
651 with phalloidin and DAPI for 1 hour at room temperature.

652 Confocal images were acquired with an upright Meta laser scanning confocal  
653 microscope (LSM710; Zeiss) equipped with plan-Apochromat 20x 0.8NA or 40x  
654 1.3NA objectives (Zeiss) and zen2012 software (Zeiss). The fluorescent images of  
655 collagen fibrils probed with mCherry-CNA35 were acquired by inverted microscope  
656 (Ti2; Nikon) equipped with Dragonfly spinning disc (Andor), by using plan-Apo 10x  
657 0.45NA, 20x 0.75NA or 40x 0.95NA dry objectives (Nikon) and Fusion software  
658 (Andor).

659 Fluorescent Images of the SHG signal from collagen-1 were collected with an  
660 inverted confocal microscope (LSM710; Zeiss) equipped with multiphoton laser by  
661 using 860 nm excitation with SHG signal obtained with 690 nm bandpass filter. A 40x  
662 1.3NA or 63x 1.40NA plan-apochromat oil objectives (Zeiss) were used to obtain  
663 SHG signals.

664 Fluorescence and phase contrast live images of elongating aggregates were  
665 acquired with an inverted fluorescence microscope (IX81; Olympus) equipped with  
666 CCD-camera (Hamamatsu) and an incubation box (Clear State Solutions)  
667 maintained at 37 $^{\circ}\text{C}$  and 5%  $\text{CO}_2$  with gas controller (Okolab), using plan-Apo 10x  
668 0.4NA objective (Olympus) and CellSens software (Olympus).

669

## 670 ***Collagen gel labeling and stretching***

671 Collagen fibrils were labelled with mCherry-CNA35 by mixing with purified mCherry-  
672 CNA35 protein at 2  $\mu$ M before gelling. Gels were solidified at 37  $^{\circ}$ C for 30 min.  
673 PDMS gel frame and stretchers for gel stretching were kindly gifted from Dr. James  
674 Hudson (QIMR Berghofer, Queensland, Australia). 1.5 mg/ml collagen gels were  
675 solidified as a ring-shape in PDMS frame. PDMS stretchers were inserted into the  
676 hole of the gel and expanded, and incubated for 4 hours in culture medium.  
677 Stretched gels were released and then floated in medium or re-embedded in  
678 collagen gel. For re-embedding, stretched gels were put in 1.5 mg/ml collagen gel  
679 and solidified at at 37  $^{\circ}$ C for 30 min.

680

#### 681 ***CNA35-mcherry protein purification***

682 Protein expression vector pET28a-mCherry-CNA35 was obtained from Addgene  
683 (#61607). Transformed E.coli (BL21) was cultured in 400 ml LB, and induced protein  
684 expression with isopropyl  $\beta$ -D-1-thiogalactopyranoside for 20 hours at 25 $^{\circ}$ C. Cultured  
685 bacteria were spun down, and collected bacteria pellet was sonicated. The lysate  
686 was centrifuged and the resulting supernatant was run through a column filled with  
687 N-NTA His-band resin (Millipore). Bound protein was eluted and then dialyzed for  
688 overnight in PBS at 4 $^{\circ}$ C. Endotoxin was removed by endotoxin removal columns  
689 (88274; Thermo) following with manufacturer's protocol.

690

#### 691 ***Quantitative analysis of collagen fibril alignment and aggregates elongation***

692 Fluorescent confocal images of collagen fibrils acquired SHG microscopy or CNA35  
693 probes were used for collagen fibril analysis. We analysed collagen organization in  
694 these images using Orientation J which calculates the local orientation and isotropy  
695 for each pixel in an image based on the structure tensor for that pixel (Rezakhaniha  
696 *et al.*, 2012). The structure tensor is evaluated for each pixel of the given image by  
697 calculating the spatial partial derivatives by using (a cubic B-spline) interpolation.  
698 The local orientation and isotropy for each pixel are computed based on the  
699 eigenvalues and eigenvectors of the structure tensor. We characterized three  
700 features in the organization of collagen fibrils orientations (Clemons *et al.*, 2018): i)  
701 The coherency of fibrils, defined as co-orientation in the same direction, as a  
702 measure of bundling. ii) Isotropy, the distribution of fibril orientation in the field of  
703 analysis; and iii) Polarization, defined as the principal axis of fibril orientation in  
704 anisotropic gels, relative to a reference axis. 50 X 50  $\mu$ m or 100 X 100  $\mu$ m size of  
705 ROI were selected from SHG images or CNA35 probed images respectively and  
706 used for analysis. Elongation axis of aggregates were measured by the angle tool in  
707 ImageJ, and then we calculated the angle difference between principal axis of  
708 collagen fibrils or stretching axis. The fold difference of gel coherency was measured  
709 by dividing the coherency of fibrils in the elongating area by the non-elongating area.  
710 The symmetry ratio of aggregates was measured by dividing the longest length by  
711 widest width of aggregates.

712

#### 713 ***Quantitative analysis of proliferating cells and nuclear division angle***

714 The number of cells co-stained with DAPI and anti-Ki67 antibody were counted by  
715 Imaris software (Bitplane). The number of Ki67 positive cells were divided by the  
716 total number of nucleus stained with DAPI to calculate percentage of Ki67 positive  
717 cells. For live imaging, cells expressed with NLS-mCherry to count their number. The  
718 frequency and orientation of cell division were analyzed from the time lapse images  
719 by ImageJ. We set the elongation axis of aggregate as a reference and measured  
720 the angle difference between elongation axis and dividing axis of nucleus.

721

### 722 **Analysis of nuclear tracking**

723 To obtain the migration speed of cells, we tracked individual cell nuclei using the  
724 Spot function in the Imaris software (Huebner *et al.*, 2016). The fluorescent images  
725 of cells expressing NLS-mCherry were acquired every 10 minutes for at least 50  
726 hours. To obtain the track displacement angle, we first calculated the displacement  
727 angle of nuclei from the displacement of X and Y axis between first and last position,  
728 and then measured the angle difference from elongating angle of aggregates. Track  
729 straightness was calculated from track displacement by track length. Inhibitors were  
730 treated 1 hour before the imaging.

731

### 732 **Quantitative analysis of ERK/KTR biosensor**

733 ERK activity was judged by the location of mClover fluorescent signal in individual  
734 cells. Briefly, fluorescent tagged KTRs translocate between nuclei and cytoplasm  
735 depends on kinase activity. When ERK activity is high, KTR-mClover should localize  
736 in cytoplasm (de la Cova *et al.*, 2017). Aggregates expressing ERK/KTR-mClover  
737 were transplanted into collagen gel, and were co-stained with phalloidin and DAPI  
738 after fixation. To judge the delocalization of KTR-mClover, we used line intensity  
739 scan in single plane images and then manually counted ERK active cells.

740

### 741 **Statistical analysis**

742 Significance was determined by unpaired Student's t test and one-way ANOVA by  
743 using GraphPad Prism 8 (GraphPad software).

744

745

### 746 **References**

747

- 748 Affolter, M., Zeller, R., and Caussinus, E. (2009). Tissue remodelling through branching  
749 morphogenesis. *Nat Rev Mol Cell Biol* 10, 831-842. 10.1038/nrm2797.
- 750 Andrew, D.J., and Ewald, A.J. (2010). Morphogenesis of epithelial tubes: Insights into tube  
751 formation, elongation, and elaboration. *Dev Biol* 341, 34-55. 10.1016/j.ydbio.2009.09.024.
- 752 Bastidas-Ponce, A., Scheibner, K., Lickert, H., and Bakhti, M. (2017). Cellular and molecular  
753 mechanisms coordinating pancreas development. *Development* 144, 2873-2888.  
754 10.1242/dev.140756.
- 755 Brownfield, D.G., Venugopalan, G., Lo, A., Mori, H., Tanner, K., Fletcher, D.A., and Bissell, M.J.  
756 (2013). Patterned collagen fibers orient branching mammary epithelium through distinct  
757 signaling modules. *Curr Biol* 23, 703-709. 10.1016/j.cub.2013.03.032.
- 758 Buchmann, B., Engelbrecht, L.K., Fernandez, P., Hutterer, F.P., Raich, M.K., Scheel, C.H., and  
759 Bausch, A.R. (2021). Mechanical plasticity of collagen directs branch elongation in human  
760 mammary gland organoids. *Nat Commun* 12, 2759. 10.1038/s41467-021-22988-2.
- 761 Campinho, P., Behrndt, M., Ranft, J., Risler, T., Minc, N., and Heisenberg, C.P. (2013).  
762 Tension-oriented cell divisions limit anisotropic tissue tension in epithelial spreading during  
763 zebrafish epiboly. *Nat Cell Biol* 15, 1405-1414. 10.1038/ncb2869.
- 764 Chung, S., and Andrew, D.J. (2008). The formation of epithelial tubes. *Journal of Cell Science*  
765 121, 3501-3504. 10.1242/jcs.037887.
- 766 Clemons, T.D., Bradshaw, M., Toshniwal, P., Chaudhari, N., Stevenson, A.W., Lynch, J., Fear,  
767 M.W., Wood, F.M., and Iyer, K.S. (2018). Coherency image analysis to quantify collagen  
768 architecture: implications in scar assessment. *Rsc Adv* 8, 9661-9669. 10.1039/c7ra12693j.

769 Costantini, F., and Kopan, R. (2010). Patterning a complex organ: branching morphogenesis  
770 and nephron segmentation in kidney development. *Dev Cell* *18*, 698-712.  
771 [10.1016/j.devcel.2010.04.008](https://doi.org/10.1016/j.devcel.2010.04.008).  
772 de la Cova, C., Townley, R., Regot, S., and Greenwald, I. (2017). A Real-Time Biosensor for  
773 ERK Activity Reveals Signaling Dynamics during *C. elegans* Cell Fate Specification. *Dev Cell* *42*,  
774 542-553 e544. [10.1016/j.devcel.2017.07.014](https://doi.org/10.1016/j.devcel.2017.07.014).  
775 Debnath, J., Mills, K.R., Collins, N.L., Reginato, M.J., Muthuswamy, S.K., and Brugge, J.S.  
776 (2002). The role of apoptosis in creating and maintaining luminal space within normal and  
777 oncogene-expressing mammary acini. *Cell* *111*, 29-40.  
778 Debnath, J., Muthuswamy, S.K., and Brugge, J.S. (2003). Morphogenesis and oncogenesis of  
779 MCF-10A mammary epithelial acini grown in three-dimensional basement membrane  
780 cultures. *Methods* *30*, 256-268.  
781 Doyle, A.D., and Yamada, K.M. (2016). Mechanosensing via cell-matrix adhesions in 3D  
782 microenvironments. *Exp Cell Res* *343*, 60-66. [10.1016/j.yexcr.2015.10.033](https://doi.org/10.1016/j.yexcr.2015.10.033).  
783 Economou, A.D., Brock, L.J., Cobourne, M.T., and Green, J.B. (2013). Whole population cell  
784 analysis of a landmark-rich mammalian epithelium reveals multiple elongation mechanisms.  
785 *Development* *140*, 4740-4750. [10.1242/dev.096545](https://doi.org/10.1242/dev.096545).  
786 Ewald, A.J., Brenot, A., Duong, M., Chan, B.S., and Werb, Z. (2008). Collective epithelial  
787 migration and cell rearrangements drive mammary branching morphogenesis. *Dev Cell* *14*,  
788 570-581. [10.1016/i.devcel.2008.03.003](https://doi.org/10.1016/i.devcel.2008.03.003).  
789 Frantz, C., Stewart, K.M., and Weaver, V.M. (2010). The extracellular matrix at a glance. *J*  
790 *Cell Sci* *123*, 4195-4200. [10.1242/jcs.023820](https://doi.org/10.1242/jcs.023820).  
791 Giannone, G., and Sheetz, M.P. (2006). Substrate rigidity and force define form through  
792 tyrosine phosphatase and kinase pathways. *Trends in Cell Biology* *16*, 213-223.  
793 <https://doi.org/10.1016/j.tcb.2006.02.005>.  
794 Gjorevski, N., and Nelson, C.M. (2010). Branch formation during organ development. *Wiley*  
795 *Interdiscip Rev Syst Biol Med* *2*, 734-741. [10.1002/wsbm.96](https://doi.org/10.1002/wsbm.96).  
796 Gjorevski, N., Piotrowski, A.S., Varner, V.D., and Nelson, C.M. (2015). Dynamic tensile forces  
797 drive collective cell migration through three-dimensional extracellular matrices. *Sci Rep* *5*,  
798 11458. [10.1038/srep11458](https://doi.org/10.1038/srep11458).  
799 Gong, Y., Mo, C., and Fraser, S.E. (2004). Planar cell polarity signalling controls cell division  
800 orientation during zebrafish gastrulation. *Nature* *430*, 689-693. [10.1038/nature02796](https://doi.org/10.1038/nature02796).  
801 Goodwin, K., and Nelson, C.M. (2020). Branching morphogenesis. *Development* *147*.  
802 [10.1242/dev.184499](https://doi.org/10.1242/dev.184499).  
803 Graham, M.F., Diegelmann, R.F., Elson, C.O., Lindblad, W.J., Gotschalk, N., Gay, S., and Gay,  
804 R. (1988). Collagen content and types in the intestinal strictures of Crohn's disease.  
805 *Gastroenterology* *94*, 257-265. [10.1016/0016-5085\(88\)90411-8](https://doi.org/10.1016/0016-5085(88)90411-8).  
806 Guo, C.L., Ouyang, M., Yu, J.Y., Maslov, J., Price, A., and Shen, C.Y. (2012). Long-range  
807 mechanical force enables self-assembly of epithelial tubular patterns. *Proc Natl Acad Sci U S*  
808 *A* *109*, 5576-5582. [10.1073/pnas.1114781109](https://doi.org/10.1073/pnas.1114781109).  
809 Hall, M.S., Alisafaei, F., Ban, E., Feng, X., Hui, C.-Y., Shenoy, V.B., and Wu, M. (2016). Fibrous  
810 nonlinear elasticity enables positive mechanical feedback between cells and ECMs.  
811 *Proceedings of the National Academy of Sciences* *113*, 14043-14048.  
812 [10.1073/pnas.1613058113](https://doi.org/10.1073/pnas.1613058113).  
813 Harunaga, J., Hsu, J.C., and Yamada, K.M. (2011). Dynamics of salivary gland morphogenesis.  
814 *J Dent Res* *90*, 1070-1077. [10.1177/0022034511405330](https://doi.org/10.1177/0022034511405330).

815 Harunaga, J.S., Doyle, A.D., and Yamada, K.M. (2014). Local and global dynamics of the  
816 basement membrane during branching morphogenesis require protease activity and  
817 actomyosin contractility. *Dev Biol* 394, 197-205. [10.1016/j.ydbio.2014.08.014](https://doi.org/10.1016/j.ydbio.2014.08.014).

818 Heino, J. (2000). The collagen receptor integrins have distinct ligand recognition and  
819 signaling functions. *Matrix Biology* 19, 319-323. [https://doi.org/10.1016/S0945-](https://doi.org/10.1016/S0945-053X(00)00076-7)  
820 [053X\(00\)00076-7](https://doi.org/10.1016/S0945-053X(00)00076-7).

821 Huebner, R.J., Neumann, N.M., and Ewald, A.J. (2016). Mammary epithelial tubes elongate  
822 through MAPK-dependent coordination of cell migration. *Development* 143, 983-993.  
823 [10.1242/dev.127944](https://doi.org/10.1242/dev.127944).

824 Ingman, W.V., Wyckoff, J., Gouon-Evans, V., Condeelis, J., and Pollard, J.W. (2006).  
825 Macrophages promote collagen fibrillogenesis around terminal end buds of the developing  
826 mammary gland. *Dev Dyn* 235, 3222-3229. [10.1002/dvdy.20972](https://doi.org/10.1002/dvdy.20972).

827 Iruela-Arispe, M.L., and Beitel, G.J. (2013). Tubulogenesis. *Development* 140, 2851-2855.  
828 [10.1242/dev.070680](https://doi.org/10.1242/dev.070680).

829 Kanematsu, A., Marui, A., Yamamoto, S., Ozeki, M., Hirano, Y., Yamamoto, M., Ogawa, O.,  
830 Komeda, M., and Tabata, Y. (2004). Type I collagen can function as a reservoir of basic  
831 fibroblast growth factor. *Journal of Controlled Release* 99, 281-292.  
832 <https://doi.org/10.1016/j.jconrel.2004.07.008>.

833 Käpylä, J., Ivaska, J., Riikonen, R., Nykvist, P., Pentikäinen, O., Johnson, M., and Heino, J.  
834 (2000). Integrin alpha(2)I domain recognizes type I and type IV collagens by different  
835 mechanisms. *J Biol Chem* 275, 3348-3354. [10.1074/jbc.275.5.3348](https://doi.org/10.1074/jbc.275.5.3348).

836 Keely, P.J., Wu, J.E., and Santoro, S.A. (1995). The spatial and temporal expression of the  
837 alpha 2 beta 1 integrin and its ligands, collagen I, collagen IV, and laminin, suggest important  
838 roles in mouse mammary morphogenesis. *Differentiation* 59, 1-13. [10.1046/j.1432-](https://doi.org/10.1046/j.1432-0436.1995.5910001.x)  
839 [0436.1995.5910001.x](https://doi.org/10.1046/j.1432-0436.1995.5910001.x).

840 Keller, R. (2002). Shaping the vertebrate body plan by polarized embryonic cell movements.  
841 *Science* 298, 1950-1954.

842 Keller, R. (2006). Mechanisms of elongation in embryogenesis. *Development* 133, 2291-  
843 2302. [10.1242/dev.02406](https://doi.org/10.1242/dev.02406).

844 Krahn, K.N., Bouten, C.V., van Tuijl, S., van Zandvoort, M.A., and Merks, M. (2006).  
845 Fluorescently labeled collagen binding proteins allow specific visualization of collagen in  
846 tissues and live cell culture. *Anal Biochem* 350, 177-185. [10.1016/j.ab.2006.01.013](https://doi.org/10.1016/j.ab.2006.01.013).

847 Krause, S., Maffini, M.V., Soto, A.M., and Sonnenschein, C. (2008). A novel 3D in vitro culture  
848 model to study stromal-epithelial interactions in the mammary gland. *Tissue Eng Part C*  
849 *Methods* 14, 261-271. [10.1089/ten.tec.2008.0030](https://doi.org/10.1089/ten.tec.2008.0030).

850 Leerberg, J.M., Gomez, G.A., Verma, S., Moussa, E.J., Wu, S.K., Priya, R., Hoffman, B.D.,  
851 Grashoff, C., Schwartz, M.A., and Yap, A.S. (2014). Tension-sensitive actin assembly supports  
852 contractility at the epithelial zonula adherens. *Curr Biol* 24, 1689-1699.  
853 [10.1016/j.cub.2014.06.028](https://doi.org/10.1016/j.cub.2014.06.028).

854 Legoff, L., Rouault, H., and Lecuit, T. (2013). A global pattern of mechanical stress polarizes  
855 cell divisions and cell shape in the growing *Drosophila* wing disc. *Development* 140, 4051-  
856 4059. [10.1242/dev.090878](https://doi.org/10.1242/dev.090878).

857 Li, N., Zhang, Y., Naylor, M.J., Schatzmann, F., Maurer, F., Wintermantel, T., Schuetz, G.,  
858 Mueller, U., Streuli, C.H., and Hynes, N.E. (2005).  $\beta 1$  integrins regulate mammary gland  
859 proliferation and maintain the integrity of mammary alveoli. *The EMBO Journal* 24, 1942-  
860 1953. <https://doi.org/10.1038/sj.emboj.7600674>.



861 Llacua, L.A., Faas, M.M., and de Vos, P. (2018). Extracellular matrix molecules and their  
862 potential contribution to the function of transplanted pancreatic islets. *Diabetologia* *61*,  
863 1261-1272. 10.1007/s00125-017-4524-8.

864 Miranti, C.K., and Brugge, J.S. (2002). Sensing the environment: a historical perspective on  
865 integrin signal transduction. *Nature Cell Biology* *4*, E83-E90. 10.1038/ncb0402-e83.

866 Mohammed, D., Pardon, G., Versaevel, M., Bruyère, C., Alaimo, L., Luciano, M., Vercruyse,  
867 E., Pruitt, B.L., and Gabriele, S. (2020). Producing Collagen Micro-stripes with Aligned Fibers  
868 for Cell Migration Assays. *Cellular and Molecular Bioengineering* *13*, 87-98. 10.1007/s12195-  
869 019-00600-4.

870 Moreno-Layseca, P., and Streuli, C.H. (2014). Signalling pathways linking integrins with cell  
871 cycle progression. *Matrix Biology* *34*, 144-153.  
872 <https://doi.org/10.1016/j.matbio.2013.10.011>.

873 Nakanishi, Y., Sugiura, F., Kishi, J., and Hayakawa, T. (1986). Collagenase inhibitor stimulates  
874 cleft formation during early morphogenesis of mouse salivary gland. *Dev Biol* *113*, 201-206.  
875 10.1016/0012-1606(86)90122-3.

876 Nerger, B.A., and Nelson, C.M. (2018). 3D culture models for studying branching  
877 morphogenesis in the mammary gland and mammalian lung. *Biomaterials*.  
878 10.1016/j.biomaterials.2018.08.043.

879 Patel, V.N., Rebutini, I.T., and Hoffman, M.P. (2006). Salivary gland branching  
880 morphogenesis. *Differentiation* *74*, 349-364. 10.1111/j.1432-0436.2006.00088.x.

881 Piotrowski-Daspit, A.S., Nerger, B.A., Wolf, A.E., Sundaresan, S., and Nelson, C.M. (2017).  
882 Dynamics of Tissue-Induced Alignment of Fibrous Extracellular Matrix. *Biophys J* *113*, 702-  
883 713. 10.1016/j.bpj.2017.06.046.

884 Price, R.G., and Spiro, R.G. (1977). Studies on the metabolism of the renal glomerular  
885 basement membrane. Turnover measurements in the rat with the use of radiolabeled  
886 amino acids. *J Biol Chem* *252*, 8597-8602.

887 Rezakhaniha, R., Agianniotis, A., Schrauwen, J.T., Griffa, A., Sage, D., Bouten, C.V., van de  
888 Vosse, F.N., Unser, M., and Stergiopoulos, N. (2012). Experimental investigation of collagen  
889 waviness and orientation in the arterial adventitia using confocal laser scanning microscopy.  
890 *Biomech Model Mechanobiol* *11*, 461-473. 10.1007/s10237-011-0325-z.

891 Riching, K.M., Cox, B.L., Salick, M.R., Pehlke, C., Riching, A.S., Ponik, S.M., Bass, B.R., Crone,  
892 W.C., Jiang, Y., Weaver, A.M., et al. (2014). 3D collagen alignment limits protrusions to  
893 enhance breast cancer cell persistence. *Biophys J* *107*, 2546-2558.  
894 10.1016/j.bpj.2014.10.035.

895 Schedin, P., and Keely, P.J. (2011). Mammary gland ECM remodeling, stiffness, and  
896 mechanosignaling in normal development and tumor progression. *Cold Spring Harb*  
897 *Perspect Biol* *3*, a003228. 10.1101/cshperspect.a003228.

898 Schottenfeld, J., Song, Y., and Ghabrial, A.S. (2010). Tube continued: morphogenesis of the  
899 *Drosophila* tracheal system. *Curr Opin Cell Biol* *22*, 633-639.  
900 <https://doi.org/10.1016/j.ceb.2010.07.016>.

901 Serra, D., Mayr, U., Boni, A., Lukonin, I., Rempfler, M., Challet Meylan, L., Stadler, M.B.,  
902 Strnad, P., Papasaikas, P., Vischi, D., et al. (2019). Self-organization and symmetry breaking  
903 in intestinal organoid development. *Nature* *569*, 66-72. 10.1038/s41586-019-1146-y.

904 Shi, M., Zhu, J., Wang, R., Chen, X., Mi, L., Walz, T., and Springer, T.A. (2011). Latent TGF-  
905 beta structure and activation. *Nature* *474*, 343-349. 10.1038/nature10152.

906 Shi, Q., Ghosh, R.P., Engelke, H., Rycroft, C.H., Cassereau, L., Sethian, J.A., Weaver, V.M., and  
907 Liphardt, J.T. (2014). Rapid disorganization of mechanically interacting systems of mammary  
908 acini. *Proc Natl Acad Sci U S A* *111*, 658-663. 10.1073/pnas.1311312110.  
909 Silberstein, G.B., and Daniel, C.W. (1982). Glycosaminoglycans in the basal lamina and  
910 extracellular matrix of the developing mouse mammary duct. *Dev Biol* *90*, 215-222.  
911 10.1016/0012-1606(82)90228-7.  
912 Simon-Assmann, P., Kedinger, M., De Arcangelis, A., Rousseau, V., and Simo, P. (1995).  
913 Extracellular matrix components in intestinal development. *Experientia* *51*, 883-900.  
914 10.1007/BF01921739.  
915 Soliman, N.A., and Yussif, S.M. (2016). Ki-67 as a prognostic marker according to breast  
916 cancer molecular subtype. *Cancer Biol Med* *13*, 496-504. 10.20892/j.issn.2095-  
917 3941.2016.0066.  
918 Sternlicht, M.D., Kouros-Mehr, H., Lu, P., and Werb, Z. (2006). Hormonal and local control of  
919 mammary branching morphogenesis. *Differentiation* *74*, 365-381. 10.1111/j.1432-  
920 0436.2006.00105.x.  
921 Streuli, Charles H., and Akhtar, N. (2009). Signal co-operation between integrins and other  
922 receptor systems. *Biochemical Journal* *418*, 491-506. 10.1042/bj20081948.  
923 Taufalele, P.V., VanderBurgh, J.A., Munoz, A., Zanotelli, M.R., and Reinhart-King, C.A. (2019).  
924 Fiber alignment drives changes in architectural and mechanical features in collagen matrices.  
925 *PLoS One* *14*, e0216537. 10.1371/journal.pone.0216537.  
926 Thery, M., Racine, V., Pepin, A., Piel, M., Chen, Y., Sibarita, J.B., and Bornens, M. (2005). The  
927 extracellular matrix guides the orientation of the cell division axis. *Nat Cell Biol* *7*, 947-953.  
928 Tucker, A.S. (2007). Salivary gland development. *Semin Cell Dev Biol* *18*, 237-244.  
929 10.1016/j.semcd.2007.01.006.  
930 Varner, V.D., and Nelson, C.M. (2014). Cellular and physical mechanisms of branching  
931 morphogenesis. *Development* *141*, 2750-2759. 10.1242/dev.104794.  
932 Verzijl, N., DeGroot, J., Thorpe, S.R., Bank, R.A., Shaw, J.N., Lyons, T.J., Bijlsma, J.W., Lafeber,  
933 F.P., Baynes, J.W., and TeKoppele, J.M. (2000). Effect of collagen turnover on the  
934 accumulation of advanced glycation end products. *J Biol Chem* *275*, 39027-39031.  
935 10.1074/jbc.M006700200.  
936 Walker, J.L., and Assoian, R.K. (2005). Integrin-dependent signal transduction regulating  
937 cyclin D1 expression and G1 phase cell cycle progression. *Cancer and Metastasis Reviews* *24*,  
938 383-393. 10.1007/s10555-005-5130-7.  
939 Wang, W.Y., Pearson, A.T., Kutys, M.L., Choi, C.K., Wozniak, M.A., Baker, B.M., and Chen, C.S.  
940 (2018). Extracellular matrix alignment dictates the organization of focal adhesions and  
941 directs uniaxial cell migration. *APL Bioeng* *2*, 046107. 10.1063/1.5052239.  
942 Williams, J.M., and Daniel, C.W. (1983). Mammary ductal elongation: differentiation of  
943 myoepithelium and basal lamina during branching morphogenesis. *Dev Biol* *97*, 274-290.  
944 10.1016/0012-1606(83)90086-6.  
945 Wipff, P.J., and Hinz, B. (2008). Integrins and the activation of latent transforming growth  
946 factor beta1 - an intimate relationship. *Eur J Cell Biol* *87*, 601-615.  
947 10.1016/j.ejcb.2008.01.012.  
948 Wozniak, M.A., Desai, R., Solski, P.A., Der, C.J., and Keely, P.J. (2003). ROCK-generated  
949 contractility regulates breast epithelial cell differentiation in response to the physical  
950 properties of a three-dimensional collagen matrix. *Journal of Cell Biology* *163*, 583-595.  
951 10.1083/jcb.200305010.  
952



954 **Figure legends**

955

956 **Figure 1. Type 1 collagen induces elongation of MCF10A anlage via cell**  
957 **proliferation.**

958 (A) Cartoon: transplantation of MCF10A cell aggregates from Matrigel™ into  
959 collagen gel. Single isolated cells were cultured on Matrigel™ and overlaid with  
960 Matrigel™-containing medium. Matrigel™ was washed out after 10 days and the  
961 aggregates re-embedded into type-1 collagen gel.

962 (B) Time lapse images of MCF10A aggregates after transfer into a collagen gel. Red  
963 arrowheads: elongation from aggregates.

964 (C) Fluorescence image of an elongated aggregate cultured for 8 days after transfer  
965 into collagen gel and stained with anti-Ki67 antibody (green), phalloidin (magenta)  
966 and DAPI (blue). Blue parenthesis: non-elongating area, red parenthesis: elongating  
967 area.

968 (D) Percentage of Ki67 positive cells in elongating and non-elongating areas of the  
969 elongated aggregates. (n = 15 aggregates).

970 (E) Time lapse images of elongating aggregates expressing NLS-mCherry. Yellow  
971 arrowheads: dividing nucleus.

972 (F) Frequency of cell division in elongating and non-elongating regions of aggregates.  
973 (n = 12 aggregates).

974 (G) Percentage of Ki67-positive cells in aggregates cultured for 0-3 days. (n = 102  
975 aggregates).

976 (H) Symmetry ratio of aggregates cultured for 0-3 days. (n = 102 aggregates).

977 (I) Percentage of Ki67 positive cells in elongating area and non-elongating areas of  
978 aggregates which broke symmetry (defined as symmetry ratio >1.5) in the first 3  
979 days of culture. (n = 18 aggregates).

980 (J) MCF10A aggregates co-stained with anti-Ki67 antibody (green) and DAPI (blue).  
981 Aggregates were cultured for 0 day (i) or 8 days (ii-iv) after treatment with vehicle (ii),  
982 mitomycin C (iii) or aphidicolin (iv).

983 (K) Percentage of Ki67 positive cells in aggregates cultured for 1 day or 8 days with  
984 or without mitomycin C or aphidicolin. (n = 63 aggregates).

985 (L) Symmetry ratio of aggregates cultured for 1 day or 8 days with or without  
986 mitomycin C or aphidicolin. (n = 237 aggregates).

987 (M) Effect of delayed inhibition of proliferation on aggregate elongation. Aggregates  
988 were cultured for 3 days before treatment with mitomycin C or aphidicolin. Data are  
989 fold change of elongation in control and drug-treated cultures (n = 57 aggregates).

990 All data are means ± SEM, \*P<0.05, \*\*P<0.01, \*\*\*P<0.001. Data in (D, F, I) were  
991 analyzed by unpaired Student's *t*-test. Data in (G, H, K-M) were analyzed with one-  
992 way ANOVA Tukey's multiple comparisons test.

993 The following figure supplements are available for figure 1:

994 **Figure supplement 1.** 3D morphology of MCF10A cells.

995 **Figure supplement 2.** Cell division and motility during aggregate elongation.

996

997 **Figure 2. Mammary cell aggregates polarize the ECM as they elongate.**

998 (A) Fluorescent image of collagen fiber alignment and elongated aggregates  
999 expressing the cell membrane marker GFP-HRasC20. Collagen fibers were labeled  
1000 with mCherry-CNA35 peptide (magenta).

1001 (B) Cartoon of symmetry ratio of aggregates (i) and gel coherency (ii).

1002 (C) Scatter plot of aggregate symmetry ratio and collagen fiber coherency. (n = 75  
1003 aggregates).

1004 (D) Regional analysis of collagen coherency around aggregates. Cartoon illustrates  
1005 the approach: for elongating aggregates coherency was measured in regions of  
1006 interest (ROIs) placed both at the tips of elongations and proximate to their non-  
1007 rounded areas. For rounded aggregates, ROIs were placed orthogonally. Regional  
1008 differences in coherency were measured as the fold difference, measured around  
1009 rounded aggregates (n = 19 aggregates) and elongated aggregates (n = 57  
1010 aggregates). Elongated aggregates were defined as symmetry ratio > 1.5. Double  
1011 headed arrow: elongating axis.

1012 (E) Fold difference of collagen fiber coherency around aggregates measured at early  
1013 stages of elongation (first 3 days of culture) subdivided based on symmetry ratio  
1014 (n = 98 aggregates).

1015 (F) Fluorescent images of collagen fibers labeled with mCherry-CNA35 (magenta)  
1016 and aggregates expressing GFP-HRasC20 cultured for 8 days with mitomycin C or  
1017 aphidicolin.

1018 (G) Coherency of collagen fibers surrounding the aggregates treated with mitomycin  
1019 C and aphidicolin. (n = 40 aggregates).

1020 (H) Fluorescent images of collagen fiber alignment with aggregates expressing GFP-  
1021 HRasC20 treated with blebbistatin or Y-27632 for 8 days. Collagen fibrils were  
1022 labeled with CNA35-mCherry (magenta).

1023 (I) Symmetry ratio of aggregates cultured for 8 days with or without blebbistatin or Y-  
1024 27632. (n = 88 aggregates).

1025 (J) Distribution of collagen fiber orientation surrounding elongated aggregates (n =  
1026 22 aggregates) or non-elongated aggregates (n = 13 aggregates).

1027 (K) Difference between elongation axis of aggregates and average angle of collagen  
1028 fibers in non-elongating area or elongating area. (n = 57 aggregates).

1029 All data are means  $\pm$  SEM, ns, not significant, \*P<0.05, \*\*P<0.01, \*\*\*P<0.001. Data  
1030 in

1031 (D, E, G, I) were analyzed with one-way ANOVA Tukey's multiple comparisons test.  
1032 Data in (K) were analyzed by unpaired Student's *t*-test.

1033 The following figure supplements are available for figure 2:

1034 **Figure supplement 1.** Immunofluorescent staining of ECM proteins in the  
1035 aggregates.

1036 **Figure supplement 2.** Effect of Rac1 GEF inhibitor on MCF10A aggregate  
1037 elongation.

1038

1039 **Figure 3. Collagen polarization induces mammary aggregate elongation.**



- 1040 (A) Second harmonic generation (SHG) images of collagen fibers in the gel with or  
1041 without stretching and incubated for 7 days after re-embedding in gel. Double head  
1042 arrow: stretching axis.
- 1043 (B) Coherency of collagen fiber in the gel with or without stretching. (n = 24 positions  
1044 in multiple gels).
- 1045 (C) Distribution of collagen fiber orientation in the gel with or without stretching. 0° is  
1046 defined as the axis of stretch. (N = 3 independent experiments).
- 1047 (D) SHG images of collagen fiber floated for 7 days with or without after stretching.  
1048 Double head arrow: stretching axis.
- 1049 (E) Coherency of collagen fiber in 7 days floated gel with or without stretching. (n =  
1050 46 positions in multiple gels).
- 1051 (F) Distribution of collagen fiber orientation in gels that had been allowed to float (7  
1052 days) with or without prior stretching. (N = 3 independent experiments).
- 1053 (G) Time lapse images of aggregates embedded in stretched gel. Double head  
1054 arrow: stretching axis.
- 1055 (H) Initiation time of aggregate elongation in the gel with or without stretching. (-  
1056 Stretch: n = 25 aggregates, +Stretch: n = 71 aggregates).
- 1057 (I) Symmetry ratio of aggregates in the early phase of culture (0-3 days) with or  
1058 without stretching. (-Stretch, day 0: n = 12, day 1: n = 12, day 2: n = 24, day 3: n =  
1059 24, +Stretch, day 0: n = 21, day 1: n = 32, day 2: n = 17, day 3: n = 22).
- 1060 (J) Distribution of elongation axes of aggregates in the gel with or without stretching.  
1061 (- Stretch: n = 112 aggregates, +Stretch: n = 115 aggregates).
- 1062 (K) Difference between elongating axis of aggregates and average angle of collagen  
1063 fibers in the gel with or without stretching. (- Stretch: n = 21 aggregates, +Stretch: n  
1064 = 102 aggregates).
- 1065 (L) Fluorescence image of aggregates cultured for 5 days after gel stretching and co-  
1066 stained with phalloidin (green) and DAPI (blue) in stretched gel. Collagen fibrils were  
1067 labeled with CNA35-mCherry (magenta).
- 1068 (M) Coherency of collagen fibers surrounding elongated aggregates in the gel with or  
1069 without stretching. (- Stretch: n = 21 aggregates, +Stretch: n = 102 aggregates).
- 1070 All data are means ± SEM; ns, not significant, \*\*P<0.01, \*\*\*P<0.001. Data in (B, E, H,  
1071 K, M) were analyzed by unpaired Student's *t*-test. Data in (I) was analyzed with one-  
1072 way ANOVA Tukey's multiple comparisons test.
- 1073 The following figure supplements are available for Figure 3:
- 1074 **Figure supplement 1.** External gel stretching aligns collagen fiber.
- 1075 **Figure supplement 2.** MCF10A aggregates elongate along the gel stretching axis.
- 1076
- 1077 **Figure 4. Collagen polarization must be sustained to stimulate mammary**  
1078 **aggregate elongation.**
- 1079 (A) Population of elongated aggregates in the re-embedded or floated gel. (N = 3  
1080 independent experiments).
- 1081 (B) The length of elongated aggregates in the re-embedded or floated gel. (N = 3  
1082 independent experiments).

1083 (C) Coherency of collagen fibers surrounding the aggregates in gels that were re-  
1084 embedded after stretch or floated for 7 days after stretching. (n = 68 aggregates).  
1085 (D) Cartoon of aggregate from stretched gel into normal collagen gel. Aggregates  
1086 were isolated from stretched gel by collagenase and re-embedded in naïve gel.  
1087 (E) Initiation time for aggregate elongation in non-stretched control gels, stretched  
1088 gels that had been re-embedded to preserve collagen polarization (embed) and after  
1089 cells were extracted and transferred into non-stretched gels (transfer) (n = 83  
1090 aggregates).  
1091 All data are means  $\pm$  SEM; ns, not significant, \*\*P<0.01, \*\*\*P<0.001. Data in (A-C)  
1092 were analyzed by unpaired Student's *t*-test. Data in (E) was analyzed with one-way  
1093 ANOVA Tukey's multiple comparisons test.

1094

1095 **Figure 5. Collagen polarization induces cell proliferation for aggregate**  
1096 **elongation.**

1097 (A) Time course of cell proliferation within aggregates in control gels (- stretch) or  
1098 after stretching (+ stretch). Data are percentage of cells that were Ki67 positive (n =  
1099 206 aggregates).  
1100 (B,C) Length (B) and (C) symmetry ratio of aggregates in stretched gel incubated  
1101 with mitomycin C or aphidicolin for 8 days. (n = 214 aggregates)  
1102 (D) Fluorescence images of elongated aggregates cultured for 7 days in the re-  
1103 embedded or floated gel after stretching. Aggregates were co-stained with anti-Ki67  
1104 antibody (green), Phalloidin (red) and DAPI (blue). Collagen fibers were labeled with  
1105 mCherry-CNA35 (magenta).  
1106 (E) Percentage of Ki67 positive cells in the aggregates cultured for 7 days in the re-  
1107 embedded or floated gel after stretching. (n = 56 aggregates).  
1108 (F) Percentage of Ki67 positive cells in the elongating area of aggregates in the re-  
1109 embedded or floated gel. (n = 47 aggregates).  
1110 All data are means  $\pm$  SEM; ns, not significant, \*\*P<0.01, \*\*\*P<0.001. Data in (E, F)  
1111 were analyzed by unpaired Student's *t*-test. Data in (A, B, C) were analyzed with  
1112 one-way ANOVA Tukey's multiple comparisons test.

1113

1114 **Figure 6. Polarized collagen promotes cell proliferation via the ERK pathway.**

1115 (A) Fluorescent images of aggregates expressing ERK/KTR-mClover biosensor  
1116 cultured for 7 days and stained with phalloidin (magenta) and DAPI (blue).  
1117 (B) Percentage of ERK active cells in elongating areas and non-elongating areas of  
1118 the aggregates. (n = 30 aggregates).  
1119 (C) Percentage of ERK active cells at the surface in elongating and non-elongating  
1120 areas of aggregates. (n = 30 aggregates).  
1121 (D) Fluorescent images of aggregates cultured for 7 days treated with FR180207  
1122 after gel stretching. Aggregates were co-stained with anti-Ki67 antibody (green),  
1123 Phalloidin (red) and DAPI (blue). Collagen fibers were labeled with mCherry-CNA35  
1124 (magenta).  
1125 (E) Percentage of Ki67-positive cells in aggregates incubated with FR180207 for  
1126 7days after stretching. (n = 24 aggregates).

1127 (F) Effect of inhibiting ERK on stretch-induced aggregate elongation. Proportion of  
1128 elongated aggregates in stretched gel incubated with FR180207 for 3 days and 7  
1129 days. (N = 3 independent experiments).

1130 (G) Length and (H) symmetry ratio of elongated aggregates incubated with  
1131 FR180207 for 7 days. (n = 166 aggregates).

1132 All data are means  $\pm$  SEM; ns, not significant, \*\*P<0.01, \*\*\*P<0.001. Data in (B, C, E,  
1133 -H) were analyzed by unpaired Student's *t*-test.

1134 The following figure supplement is available for figure 6:

1135 **Figure supplement 1. ERK biosensor and YAP1 localization in MCF10A cells.**

1136

1137 **Figure 7. Integrins are necessary for polarized collagen to stimulate elongation.**

1138 (A) Schematic of potential integrin-ERK pathway that mediates the effect of collagen  
1139 polarization on cell proliferation.

1140 (B) Immunoblot of integrin  $\alpha 2$ ,  $\beta 1$  and ERK1/2 protein levels in MCF10A cell lysate.

1141 (C) Fluorescent images of aggregates cultured for 7 days treated with AIB2 antibody  
1142 after gel stretching. Aggregates were co-stained with anti-Ki67 antibody (green),  
1143 Phalloidin (red) and DAPI (blue). Collagen fibers were labeled with mCherry-CNA35  
1144 (magenta).

1145 (D) Percentage of Ki67 positive cells in the aggregates incubated with AIB2 antibody  
1146 for 7 days after stretching the gels. (n = 35 aggregates).

1147 (E) Proportion of elongated aggregates in stretched gel incubated with AIB2  
1148 antibody for 3 days and 7 days. (N = 3 independent experiments).

1149 (F) Length and (G) symmetry ratio of elongated aggregates incubated with AIB2  
1150 antibody for 7 days. (n = 134 aggregates).

1151 (H) Fluorescent images of aggregates expressed with ERK/KTR-mClover and  
1152 incubated with IgG (control) or AIB2 antibody for 2 days after gel stretching.  
1153 Aggregates were co-stained with phalloidin (red) and DAPI (blue). Collagen fibers  
1154 were labeled with mCherry-CNA35 (magenta).

1155 (I) Percentage of ERK active cells in aggregates incubated with AIB2 antibody for 2  
1156 days or 7 days in stretched gel. (n = 78 aggregates).

1157 All data are means  $\pm$  SEM; ns, not significant, \*\*P<0.01, \*\*\*P<0.001. Data in (D-G, I)  
1158 were analyzed by unpaired Student's *t*-test.

1159

1160 **Figure 8. Model of collagen polarization as a structural memory for epithelial**  
1161 **anlage elongation.**

1162 (i) Initially isotropic epithelia anlage exert isotropic patterns of force on a non-  
1163 polarized collagen 1 gel.

1164 (ii) Initial anisotropies in force associated with symmetry-breaking of the aggregate  
1165 exert strain on collagen fibrils leading to bundling and polarization.

1166 (iii) The polarized collagen matrix provides a structural memory, that promotes  
1167 regional cell proliferation to direct further elongation of the anlage.

1168

1169 **Supplemental Figure legends**

1170

1171 **Figure 1-figure supplement 1. 3D morphology of MCF10A cells.**

1172 (A) MCF10A cells cultured in Matrigel™ for 7 days (left) and 31 days (right). Day 7  
1173 aggregate was co-stained with anti-E-cadherin antibody (green), anti-GM130  
1174 antibody (red), phalloidin (magenta) and DAPI (blue). Day 31 acinus was co-stained  
1175 with anti-Laminin V antibody (green), anti-E-cadherin antibody (red) and DAPI (blue).  
1176 (B) MCF10A cells cultured in Type 1 collagen gel for 3 days (left) and 10 days (right).  
1177 Day 3 MFC10A cells expressing GFP-HRasC20 were co-stained with anti-GM130  
1178 antibody (red), phalloidin (magenta) and DAPI (blue). Day 10 MCF10A cells were co-  
1179 stained with phalloidin (magenta) and DAPI (blue).  
1180 (C) MCF10A aggregate cultured for 7 days after transplantation from Matrigel™ back  
1181 into Matrigel™. Aggregate was co-stained with anti-Ki67 antibody (green), phalloidin  
1182 (red) and DAPI (blue).

1183

1184 **Figure 1-figure supplement 2. Cell division and motility during aggregate**  
1185 **elongation.**

1186 (A) Average angle of cell division. Principal axis of aggregate is 0°. (n = 12  
1187 aggregates).  
1188 (B) Nuclear tracking during aggregate elongation. Tails show tracking path for each  
1189 cell in the last 120 min of the movie.  
1190 (C) Speed of cell motility based on nuclear tracking in rounded and elongated  
1191 aggregates treated with mitomycin C or aphidicolin. (n = 137 movies).  
1192 (D) Cell speed, (E) Track straightness and (F) track displacement angle in elongating  
1193 aggregates. (n = 18 movies).  
1194 (G) Track straightness and (H) track displacement angle of cells in aggregates  
1195 treated with mitomycin C or aphidicolin (n = 60 movies).  
1196 All data are means ± SEM; ns, not significant, \*P<0.05, \*\*\*P<0.001. Data in (D-F)  
1197 were analyzed by unpaired Student's *t*-test. Data in (C, G, H) were analyzed with  
1198 one-way ANOVA Tukey's multiple comparisons test.

1199

1200 **Figure 2-figure supplement 1. Immunofluorescent staining of ECM proteins in**  
1201 **the aggregates.**

1202 (A) MCF10A aggregates transferred from Matrigel™ into collagen gel at day 0 (left)  
1203 and at day 4 (right). Day 0 aggregate was co-stained with anti-Laminin V antibody  
1204 (green), anti-E-cadherin antibody (red), and DAPI (blue). Day 4 aggregate was co-  
1205 stained with anti-Laminin V antibody (green), anti-E-cadherin antibody (red),  
1206 phalloidin (magenta), and DAPI (blue). \*: Y-Z slice image of yellow line.  
1207 (B) MCF10A aggregates transferred from Matrigel™ into collagen gel at day 1 (left)  
1208 and at day 7 (right). Aggregates were co-stained with anti-fibronectin antibody  
1209 (green) and DAPI (blue).

1210

1211 **Figure 2-figure supplement 2. Rac1 GEF inhibitor does not affect MCF10A**  
1212 **aggregate elongation.**

1213 (A) Fluorescent images of collagen fiber alignment with aggregates expressing GFP-  
1214 HRasC20 treated with NSC23766 for 8 days. Collagen fibers were labeled with  
1215 mCherry-CNA35 (magenta).  
1216 (B) Speed of cell movement based on nuclear tracking in rounded and elongated  
1217 aggregates treated with NSC23766. (n = 82 movies)  
1218 (C) Effect of delayed inhibition of proliferation on aggregate elongation. Aggregates  
1219 were cultured for 3 days before treatment with NSC23766. Data are fold change of  
1220 elongation in control and drug-treated cultures (n = 40 aggregates).  
1221 All data are means  $\pm$  SEM; ns, not significant, \*P<0.05, \*\*P<0.01. Data in (B,C) were  
1222 analyzed with one-way ANOVA Tukey's multiple comparisons test. Data in (D) was  
1223 analyzed by unpaired Student's *t*-test.

1224

1225 **Figure 3-figure supplement 1. External gel stretching aligns collagen fiber.**

1226 (A) PDMS gel frame and stretching device.  
1227 (B) Schematic image of stretching experiment. Gel was stretched for 4 hours and  
1228 then re-embedded in gel or floated in culture medium for 7 days.  
1229 (C) Second harmonic generation microscopy images of collagen gel with or without  
1230 stretch. Double head arrow: stretching axis.  
1231 (D) Coherency of collagen fibers in gel and (E) distribution of fiber orientation. (N = 4  
1232 independent experiments)  
1233 All data are means  $\pm$  SEM; \*\*P<0.01, \*\*\*P<0.001. Data was analyzed by unpaired  
1234 Student's *t*-test.

1235

1236 **Figure 3-figure supplement 2. MCF10A aggregates elongate along the gel  
1237 stretching axis.**

1238 (A) MCF10A aggregates in the gel after 4 hours stretching. Aggregate was co-  
1239 stained with Phalloidin (green) and DAPI (blue). Collagen fibers were labeled with  
1240 mCherry-CNA35 (magenta).  
1241 (B) Symmetry ratio of aggregates with or without gel stretching for 4 hours (n = 274  
1242 aggregates).  
1243 (C) Schematic image of measurement of elongation angle.  
1244 (D) The average angle of elongated aggregates in non-stretched gel and stretched  
1245 gel. (n = 227 aggregates).  
1246 (E) MCF10A aggregates cultured for 1 day in non-stretched and stretched gels.  
1247 Aggregates were co-stained with anti-fibronectin antibody (green) and DAPI (blue).  
1248 Collagen fibrils were labeled with CNA35-mCherry (red).  
1249 All data are means  $\pm$  SEM; ns, not significant, \*\*\*P<0.001. Data were analyzed by  
1250 unpaired Student's *t*-test.

1251

1252 **Figure 6-figure supplement 1. ERK biosensor and YAP1 localization in MCF10A  
1253 cells.**

1254 (A) Time lapse images of MCF10A monolayer cells that express ERK/KTR-mClover  
1255 biosensor treated with ERK inhibitor (FR180204).

1256 (B) YAP1 localization in rounded MCF10A aggregate cultured for 1 day after transfer  
1257 into collagen gel.

1258 (C) YAP1 localization in elongated MCF10A aggregate cultured for 8 days after  
1259 transfer into collagen gel.

1260 Aggregates in (B,C) were co-stained with anti-YAP1 antibody (green), phalloidin  
1261 (magenta) and DAPI (blue).

1262

1263 **Video 1. Time lapse images of MCF10A aggregates after transferred into**  
1264 **collagen gel.**

1265 Images were taken every 10 minutes.

1266

1267 **Video 2. Time lapse images of aggregates embedded in stretched gel.**

1268 Images were taken every 1 hour.

1269

1270



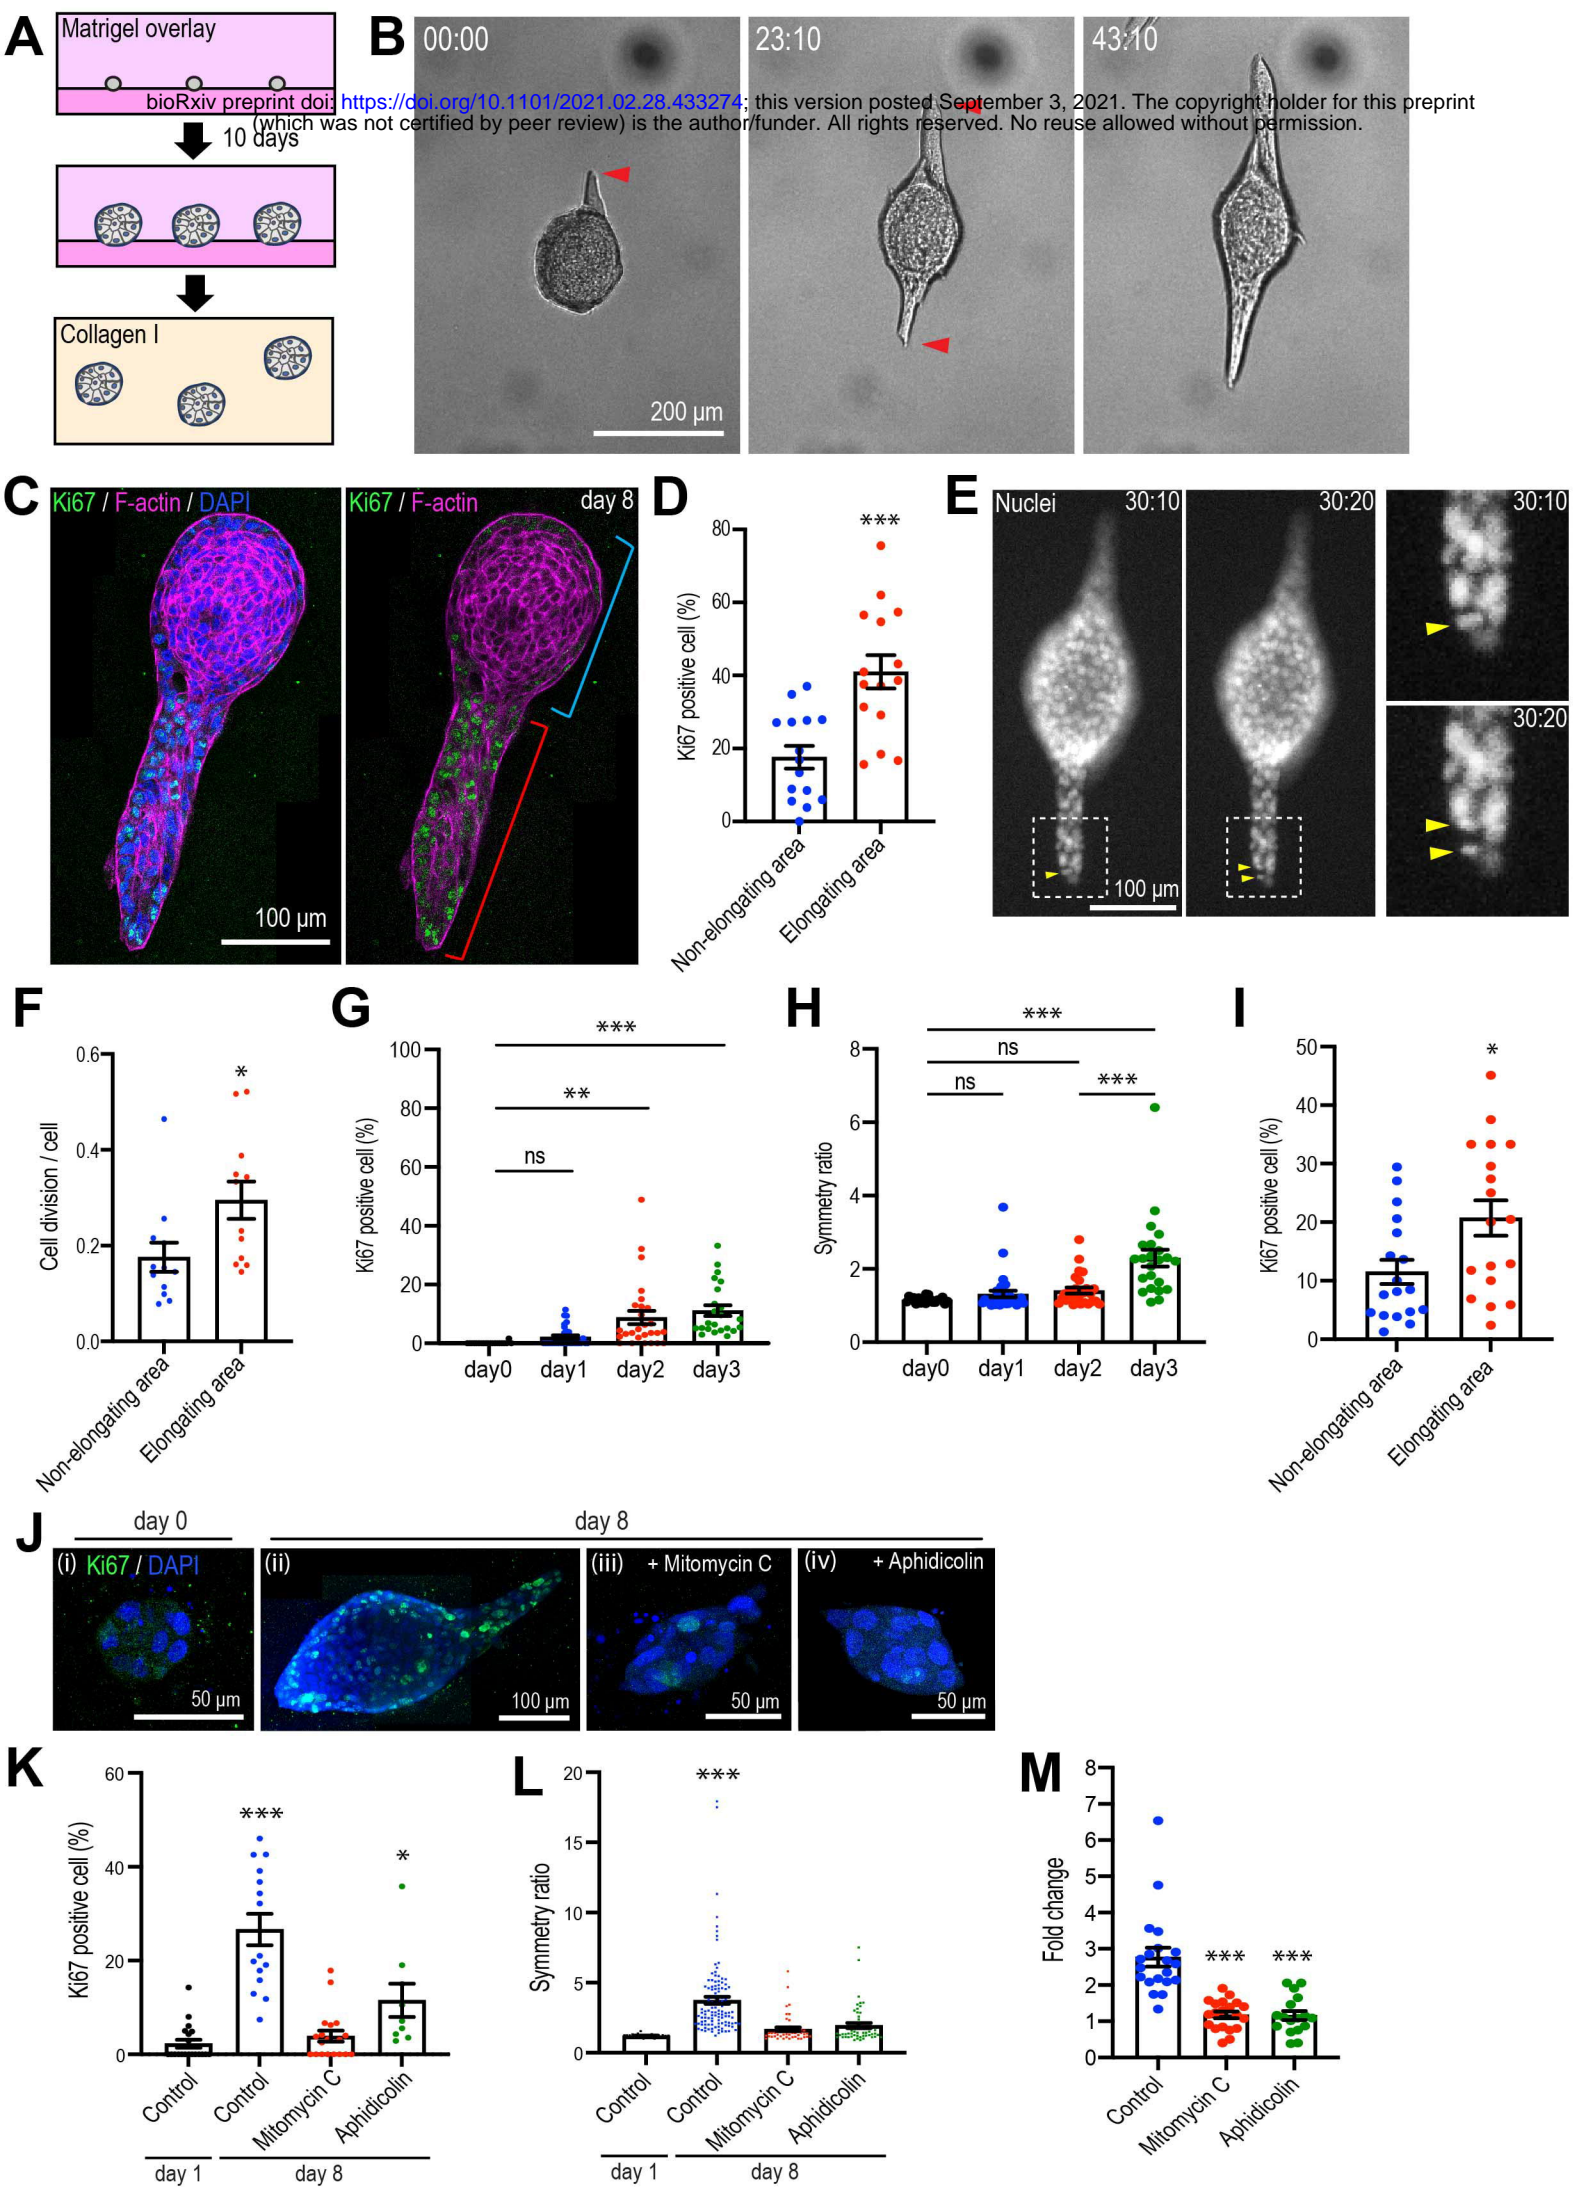

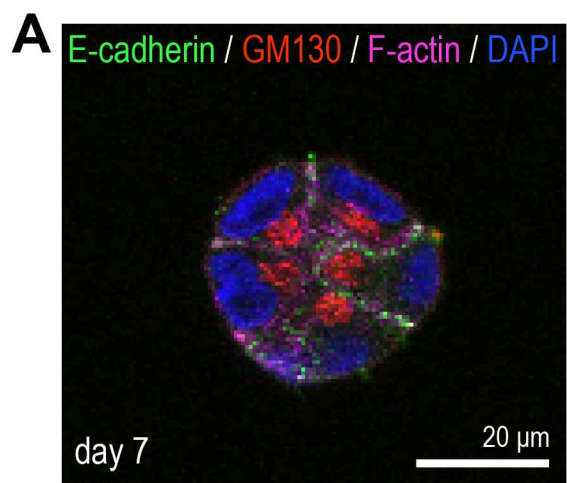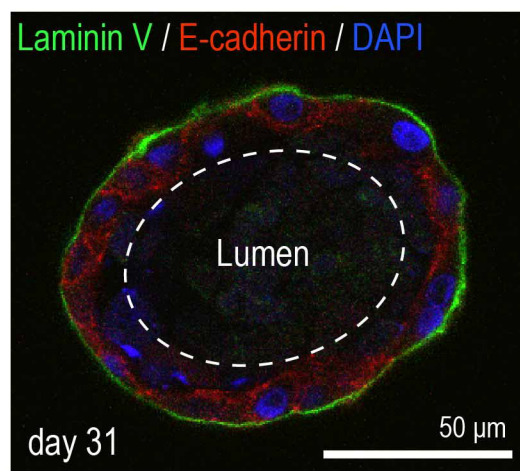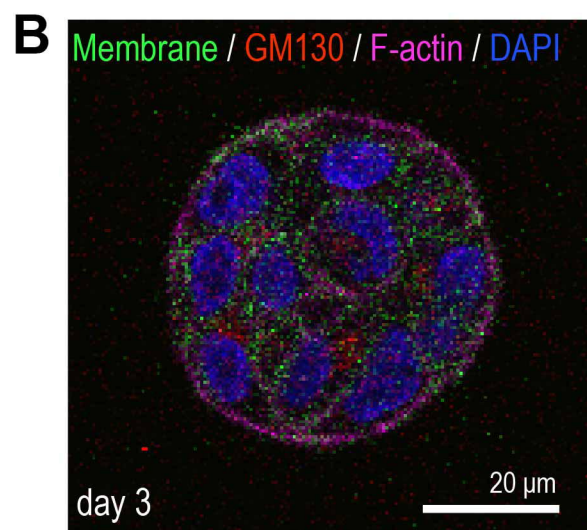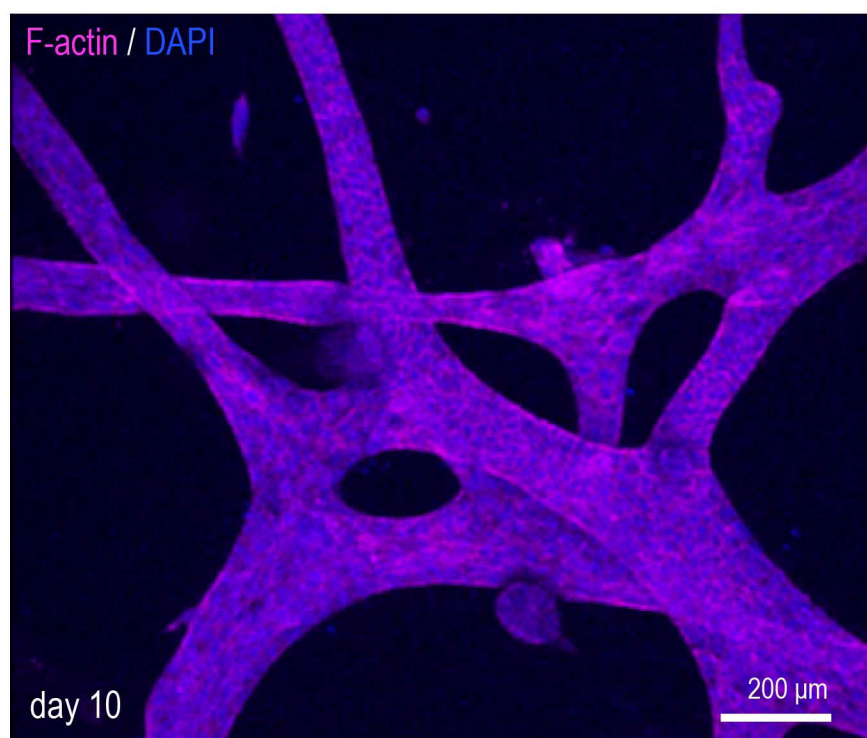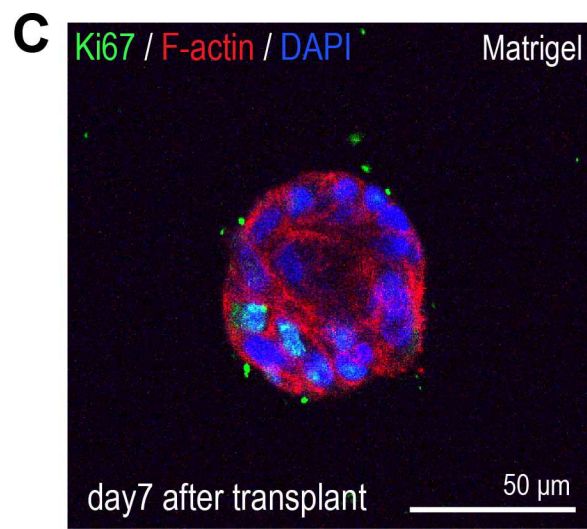



**A**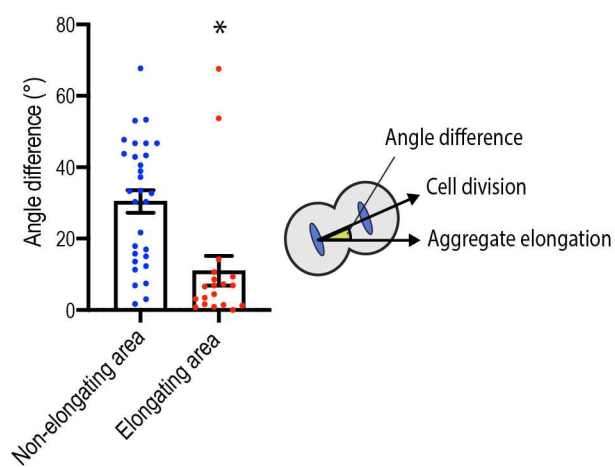**B**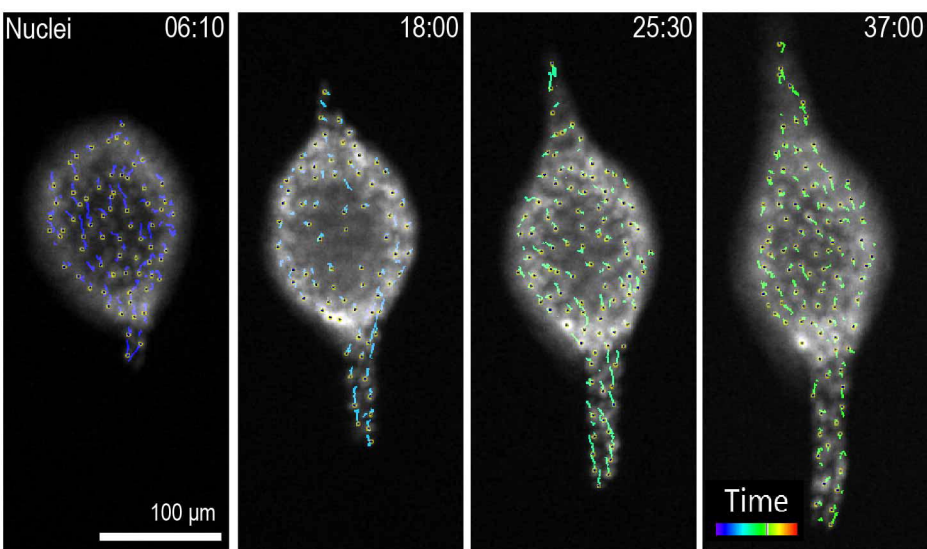**C**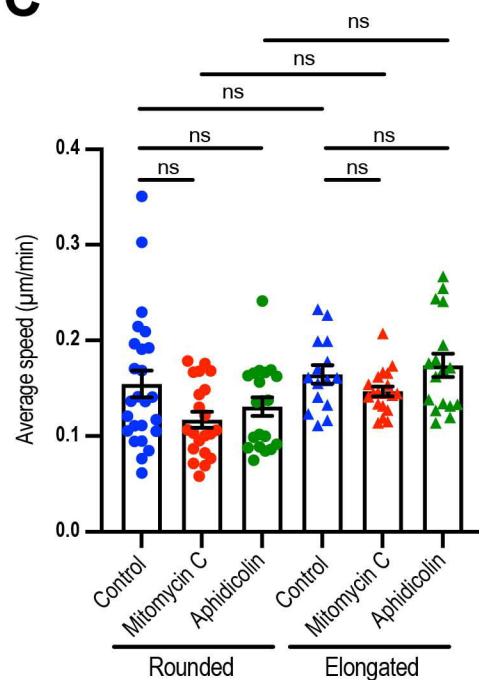**D**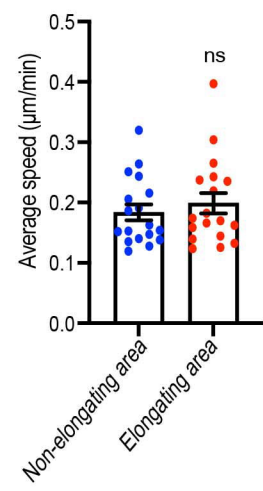**E**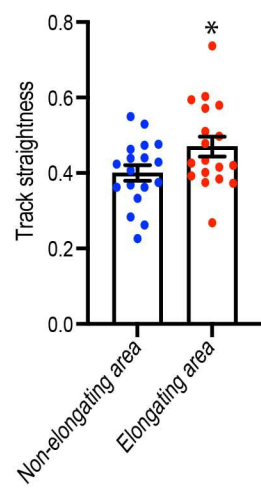**F**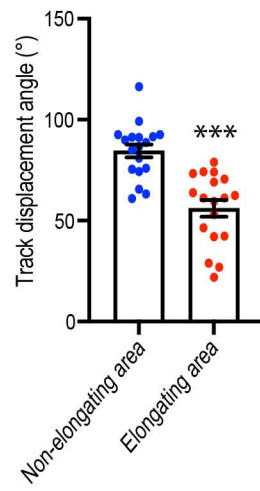**G**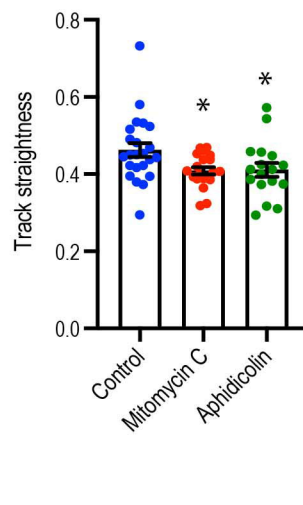**H**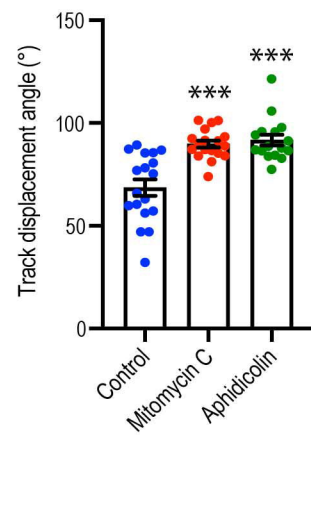



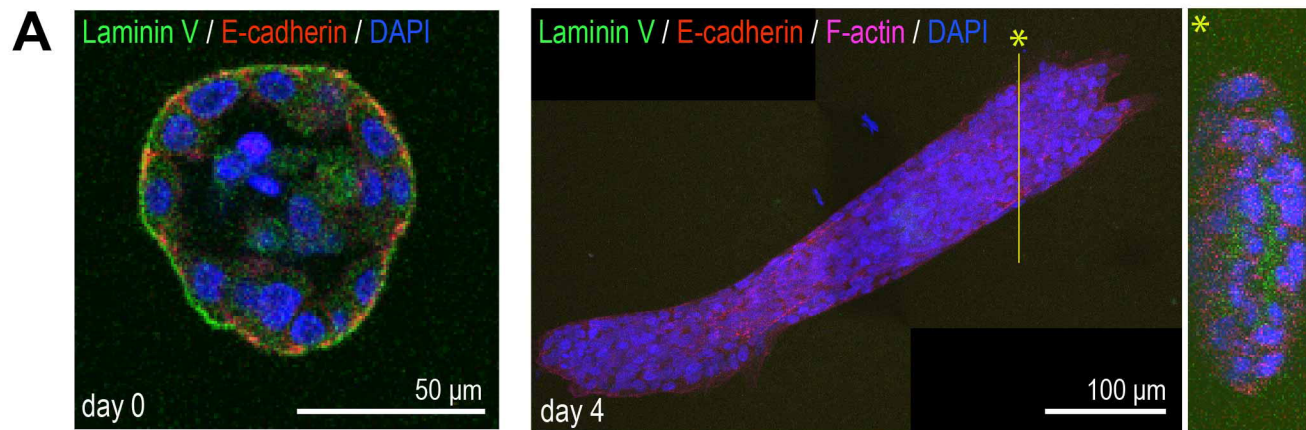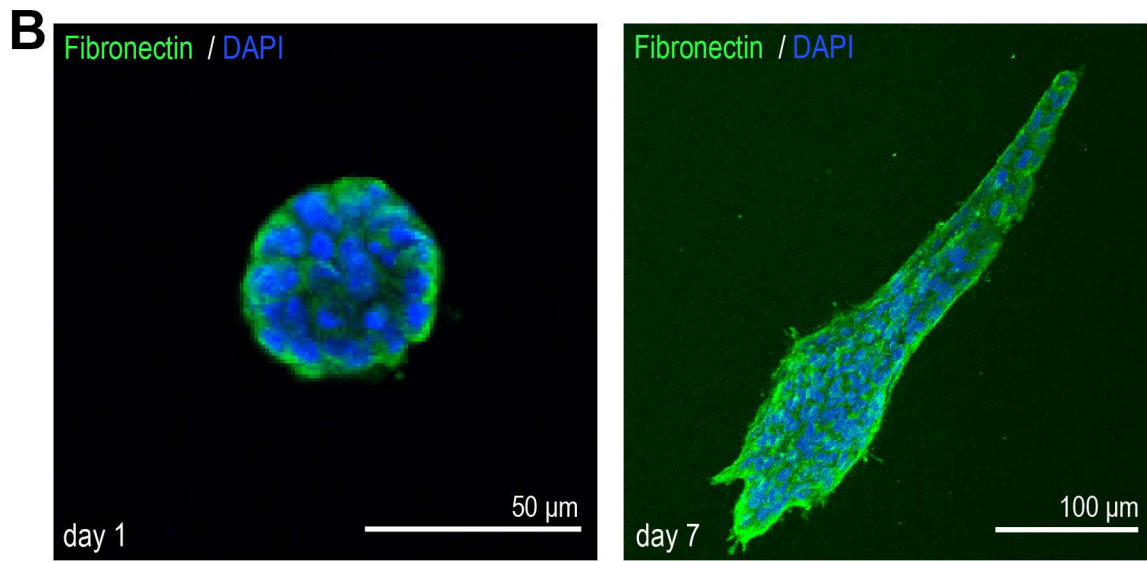



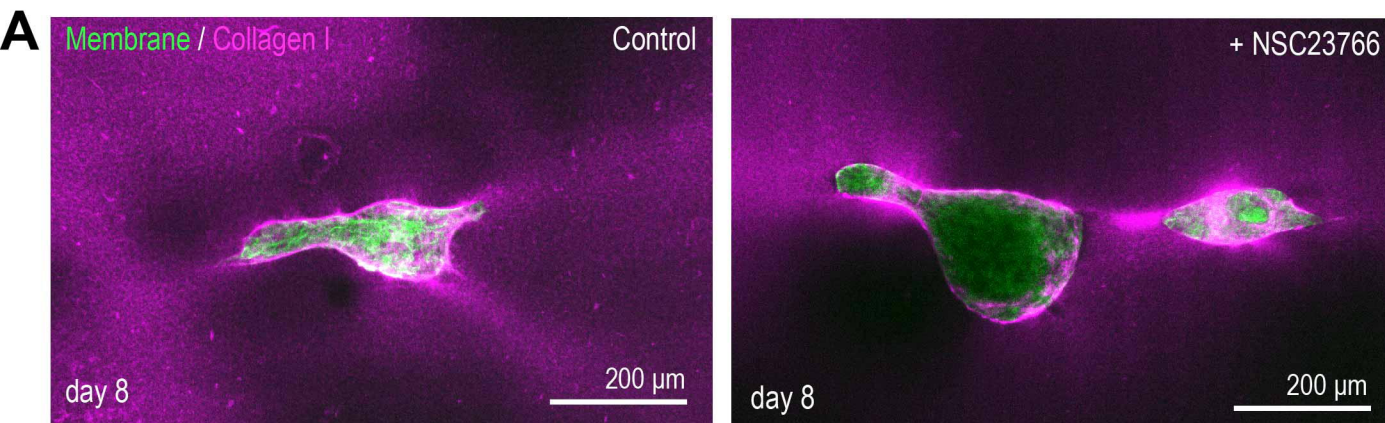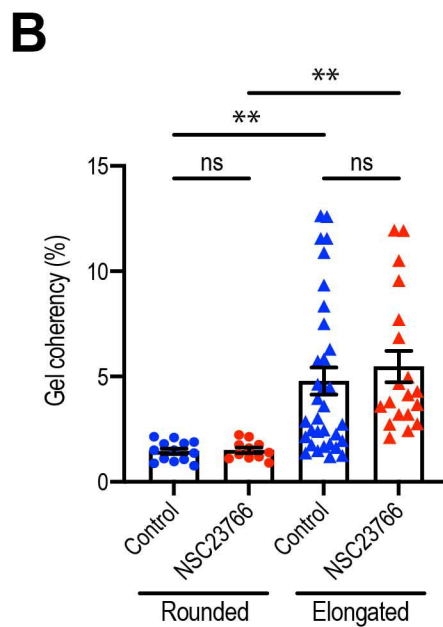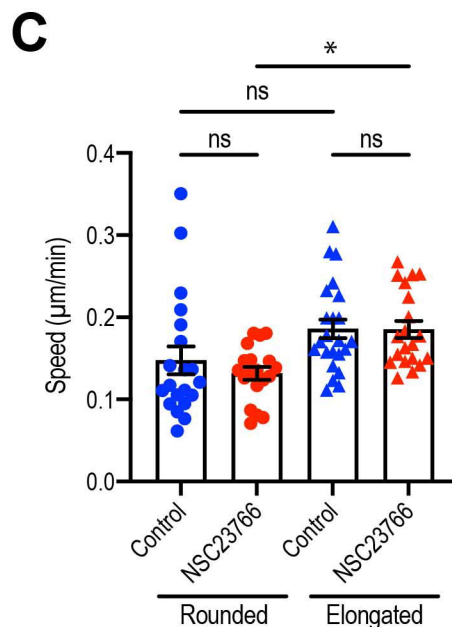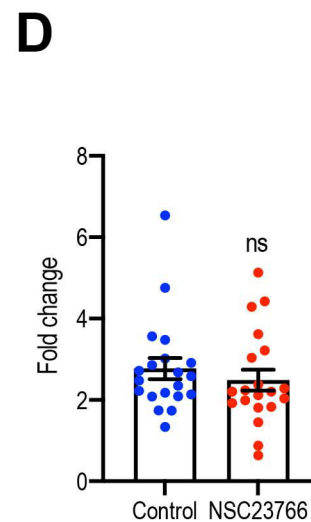



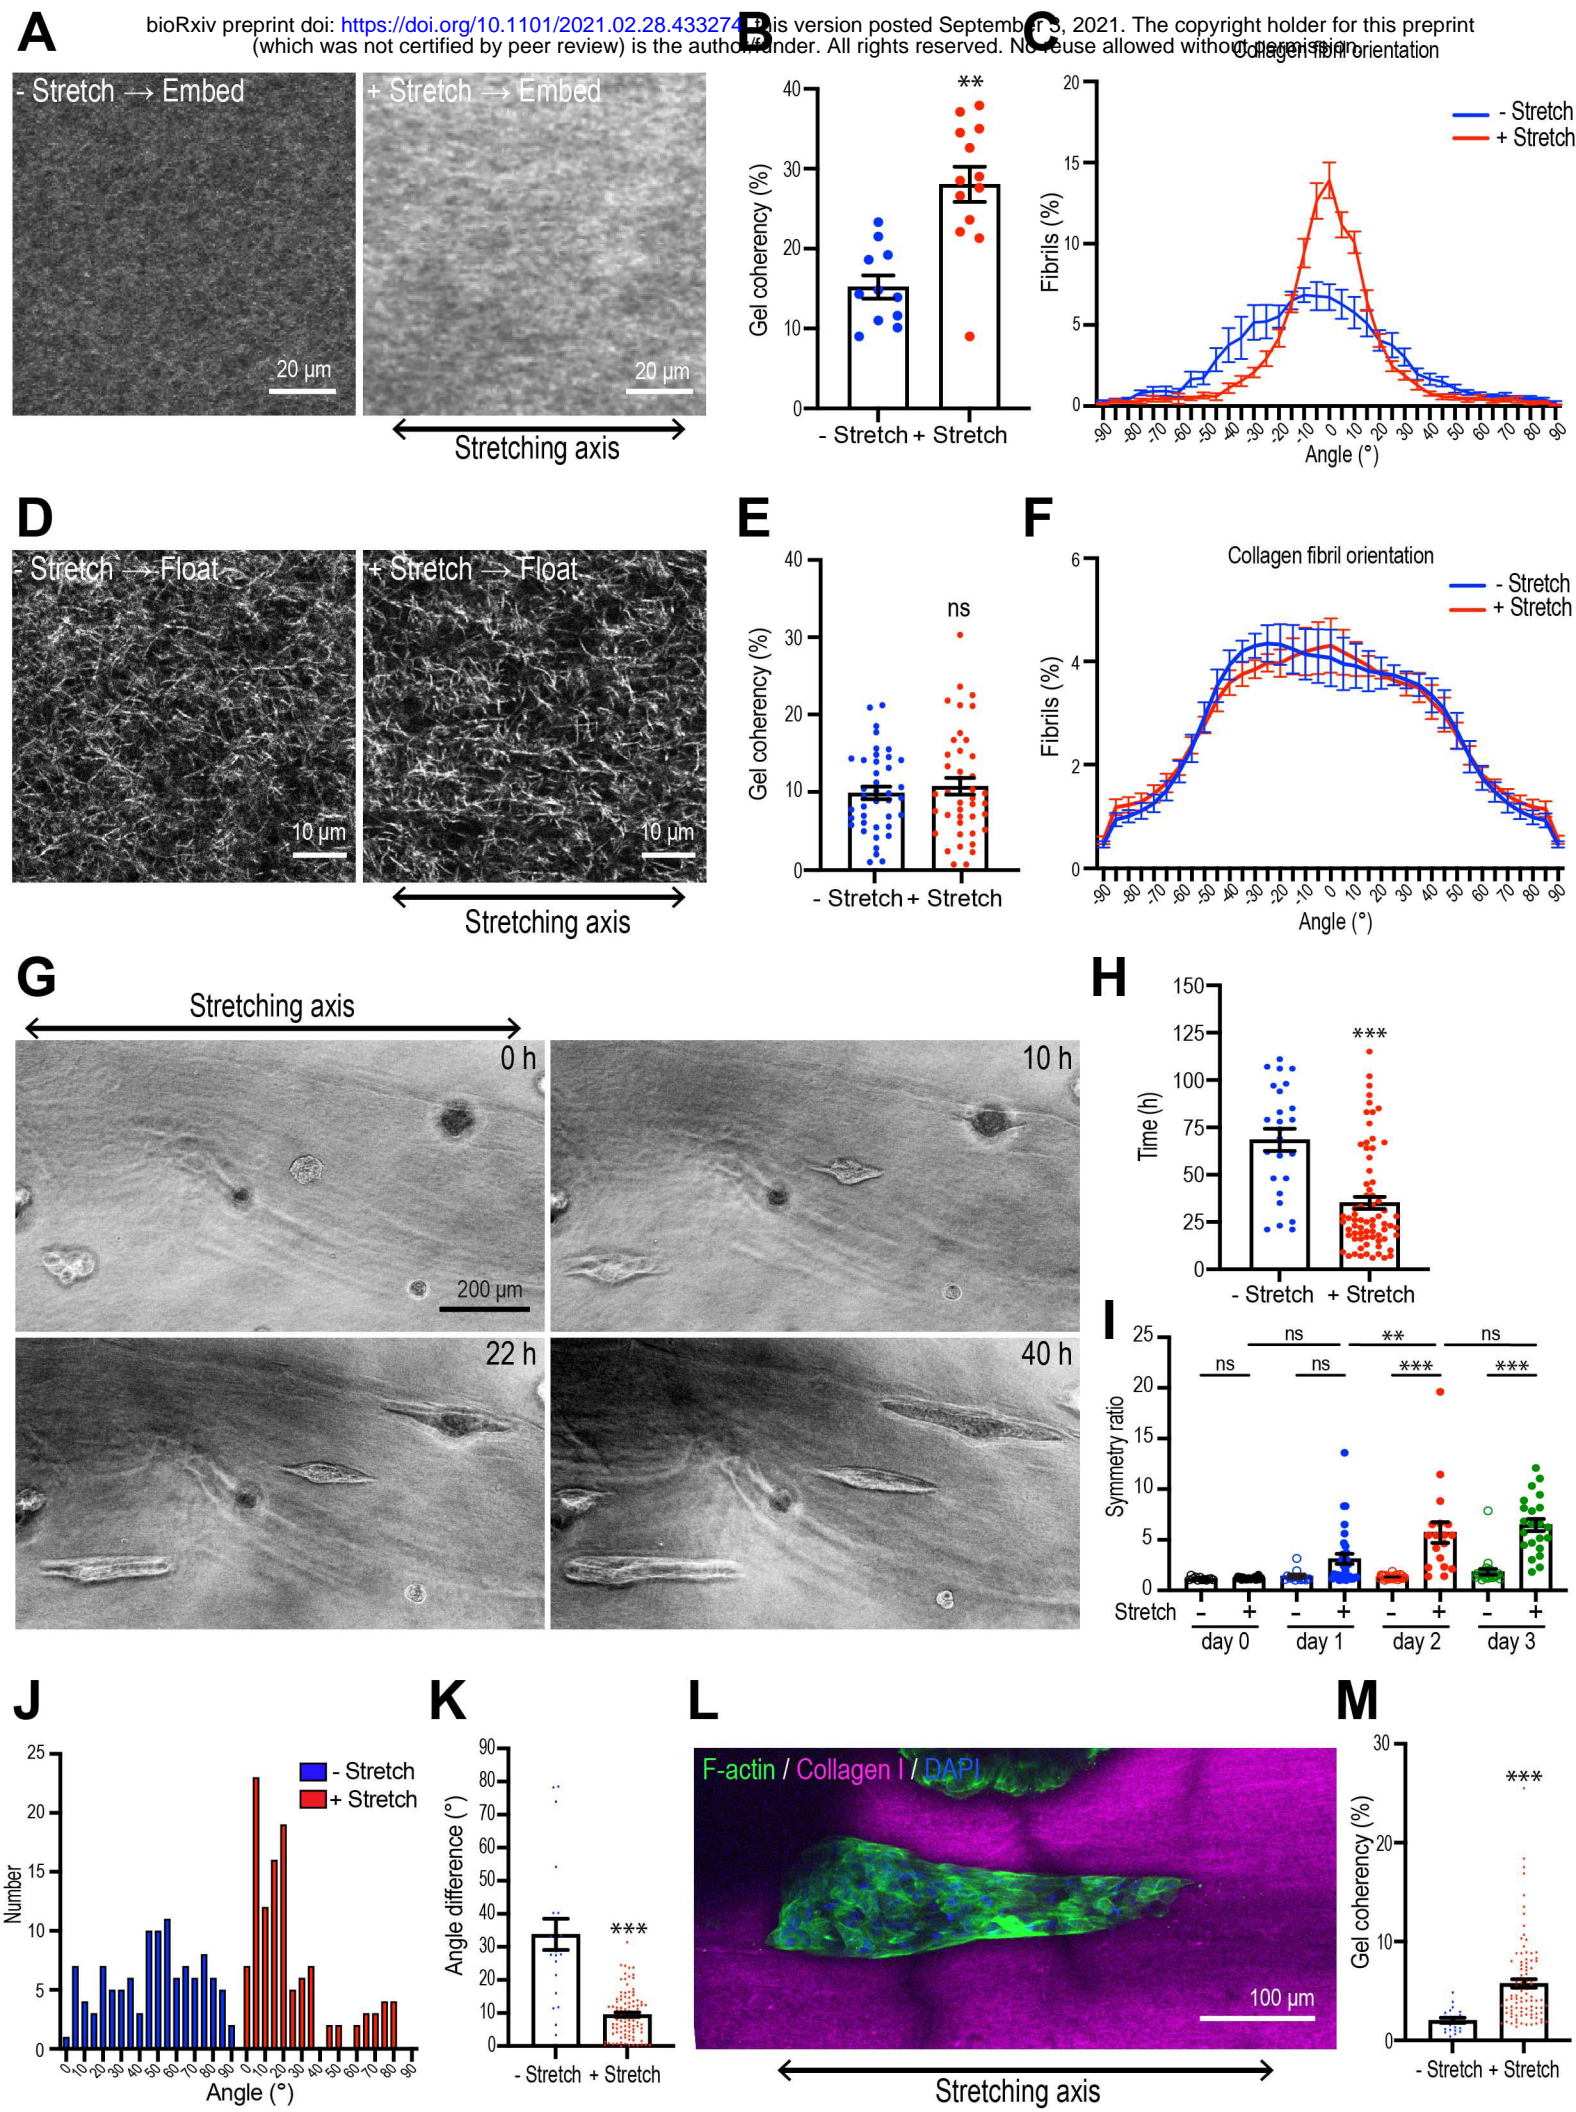

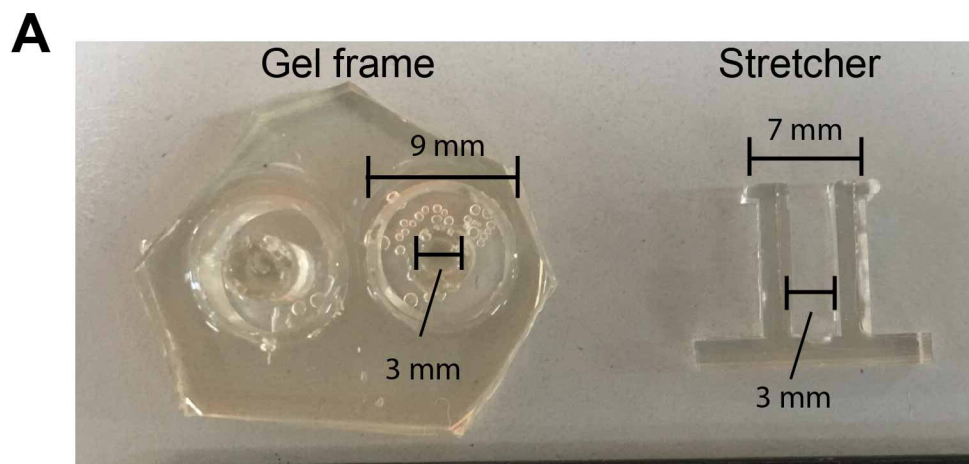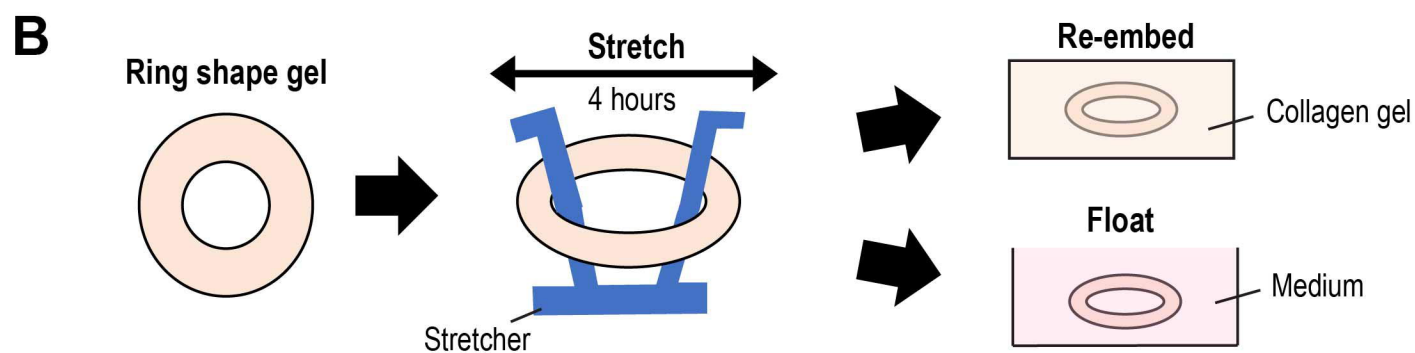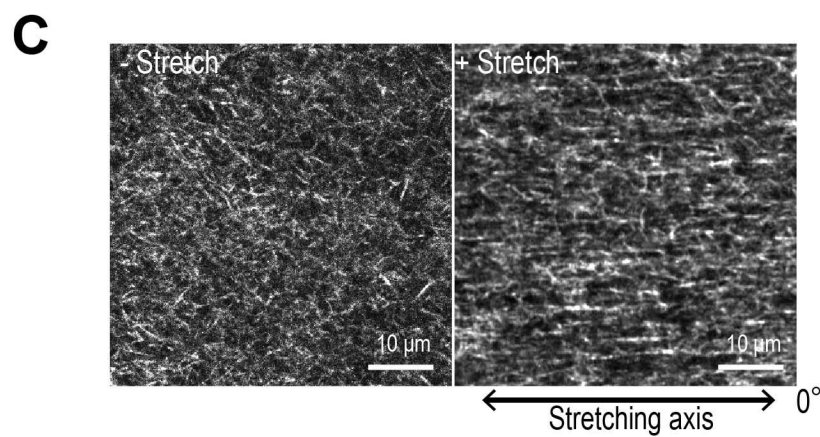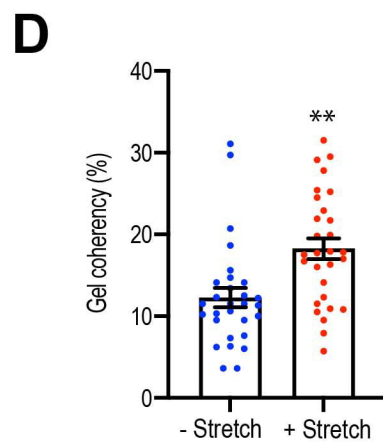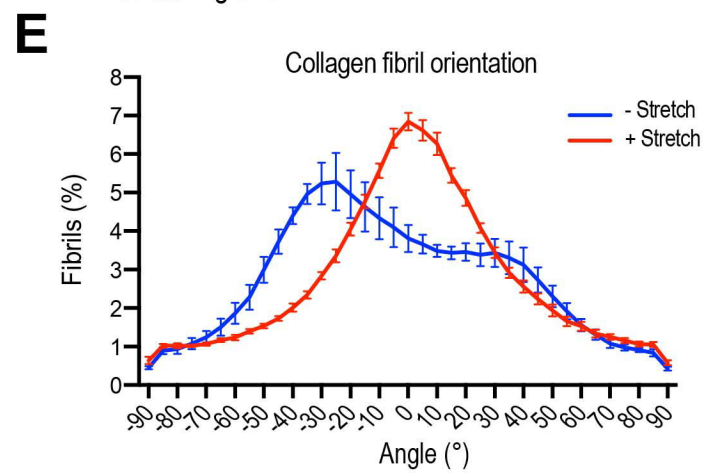



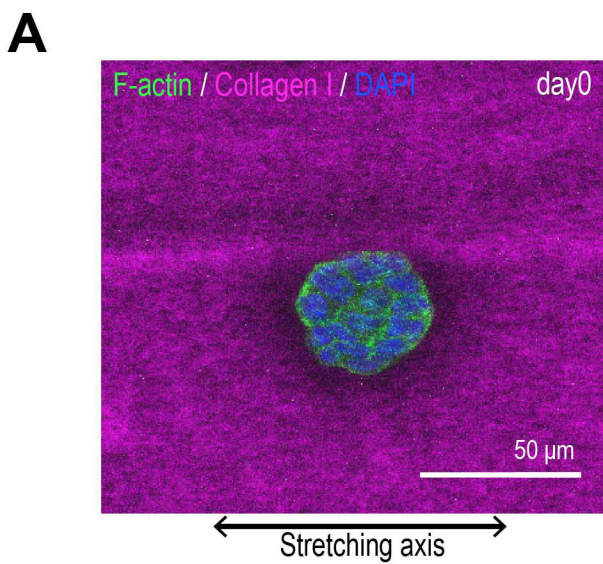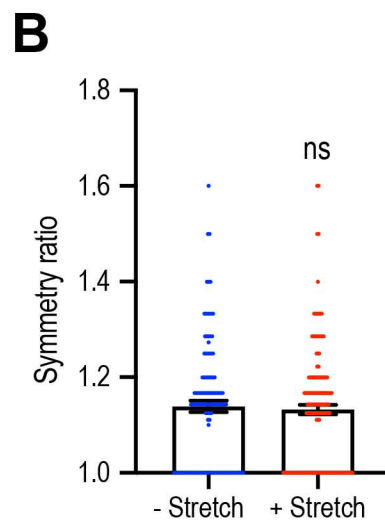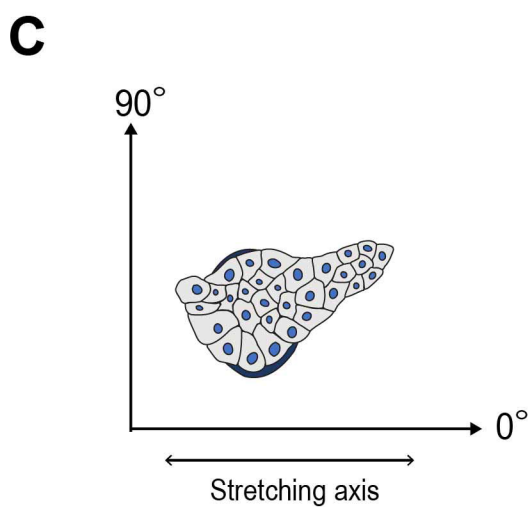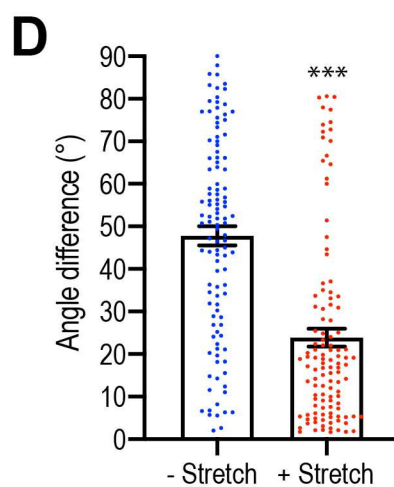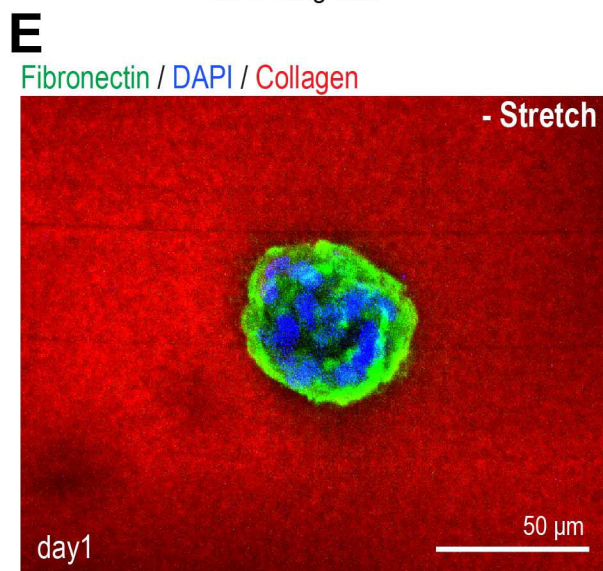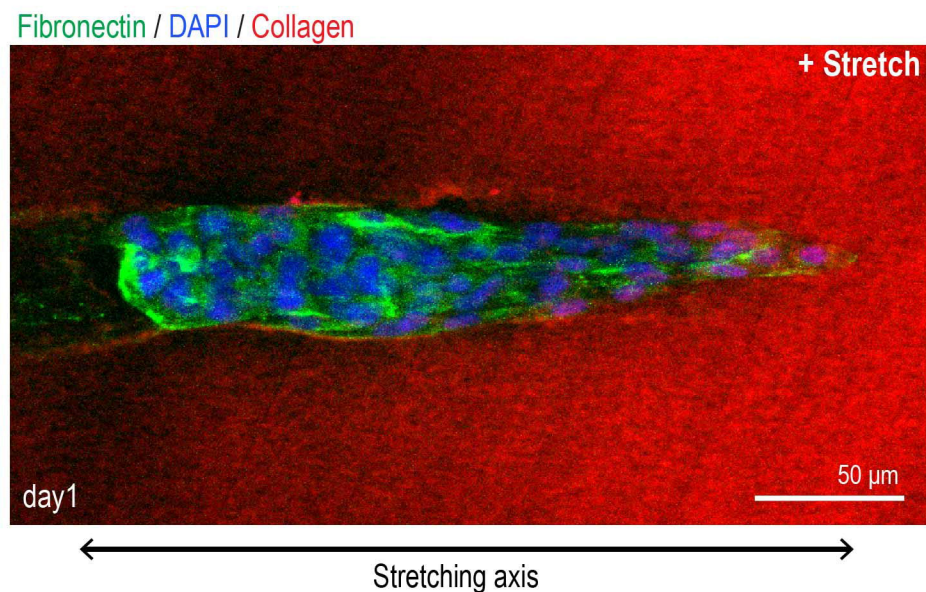

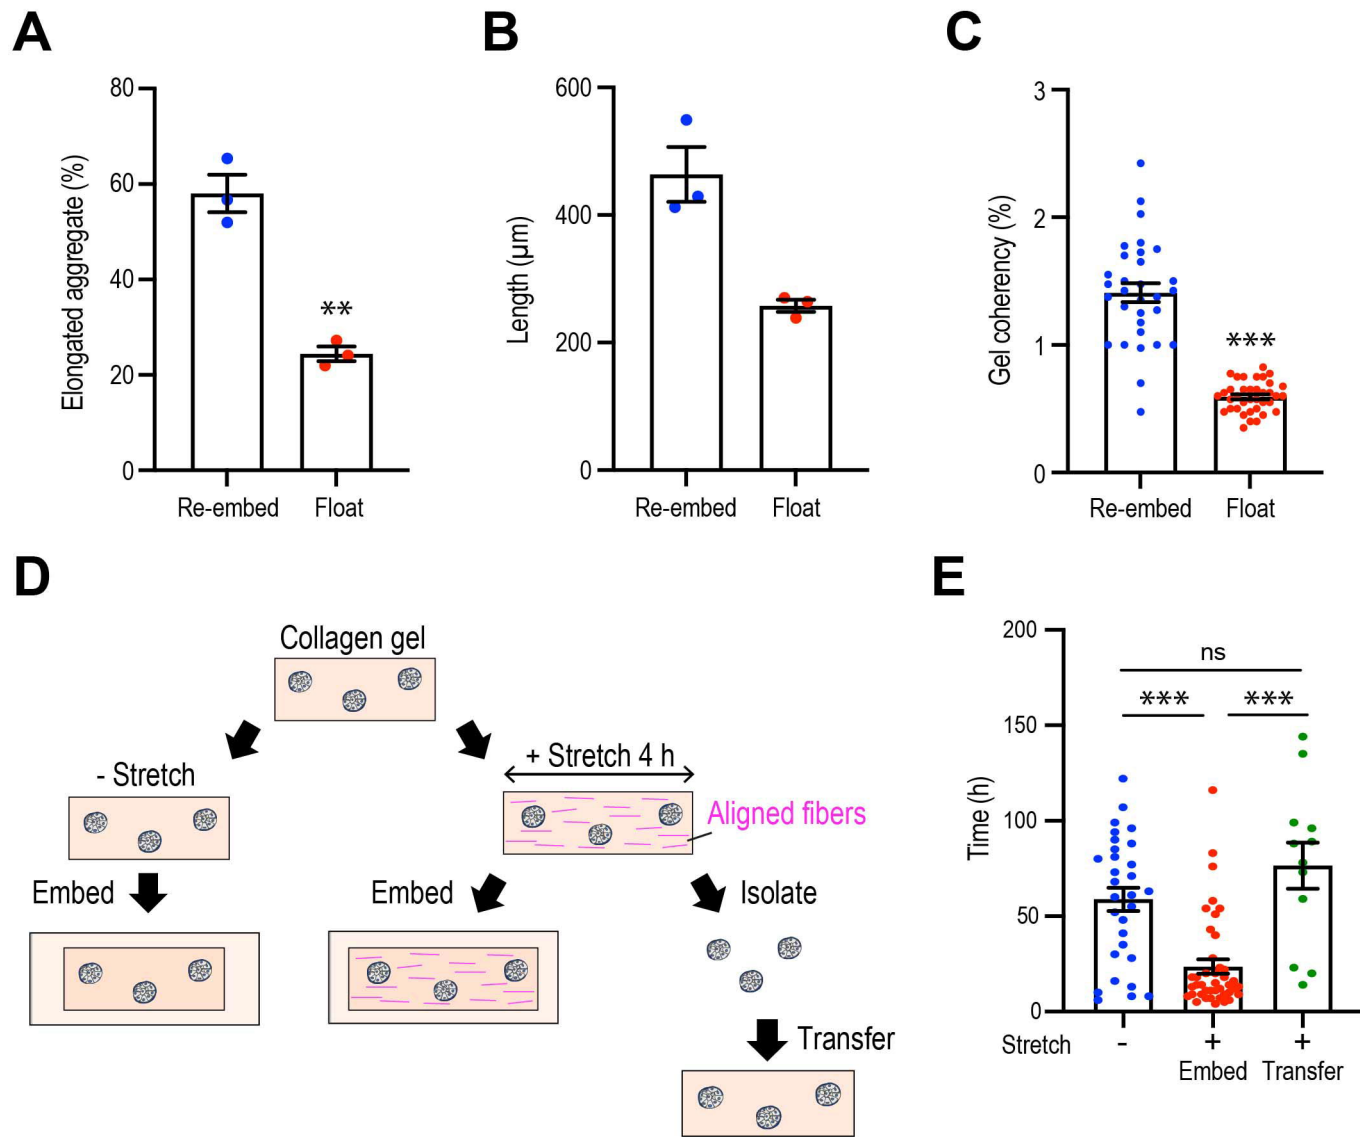





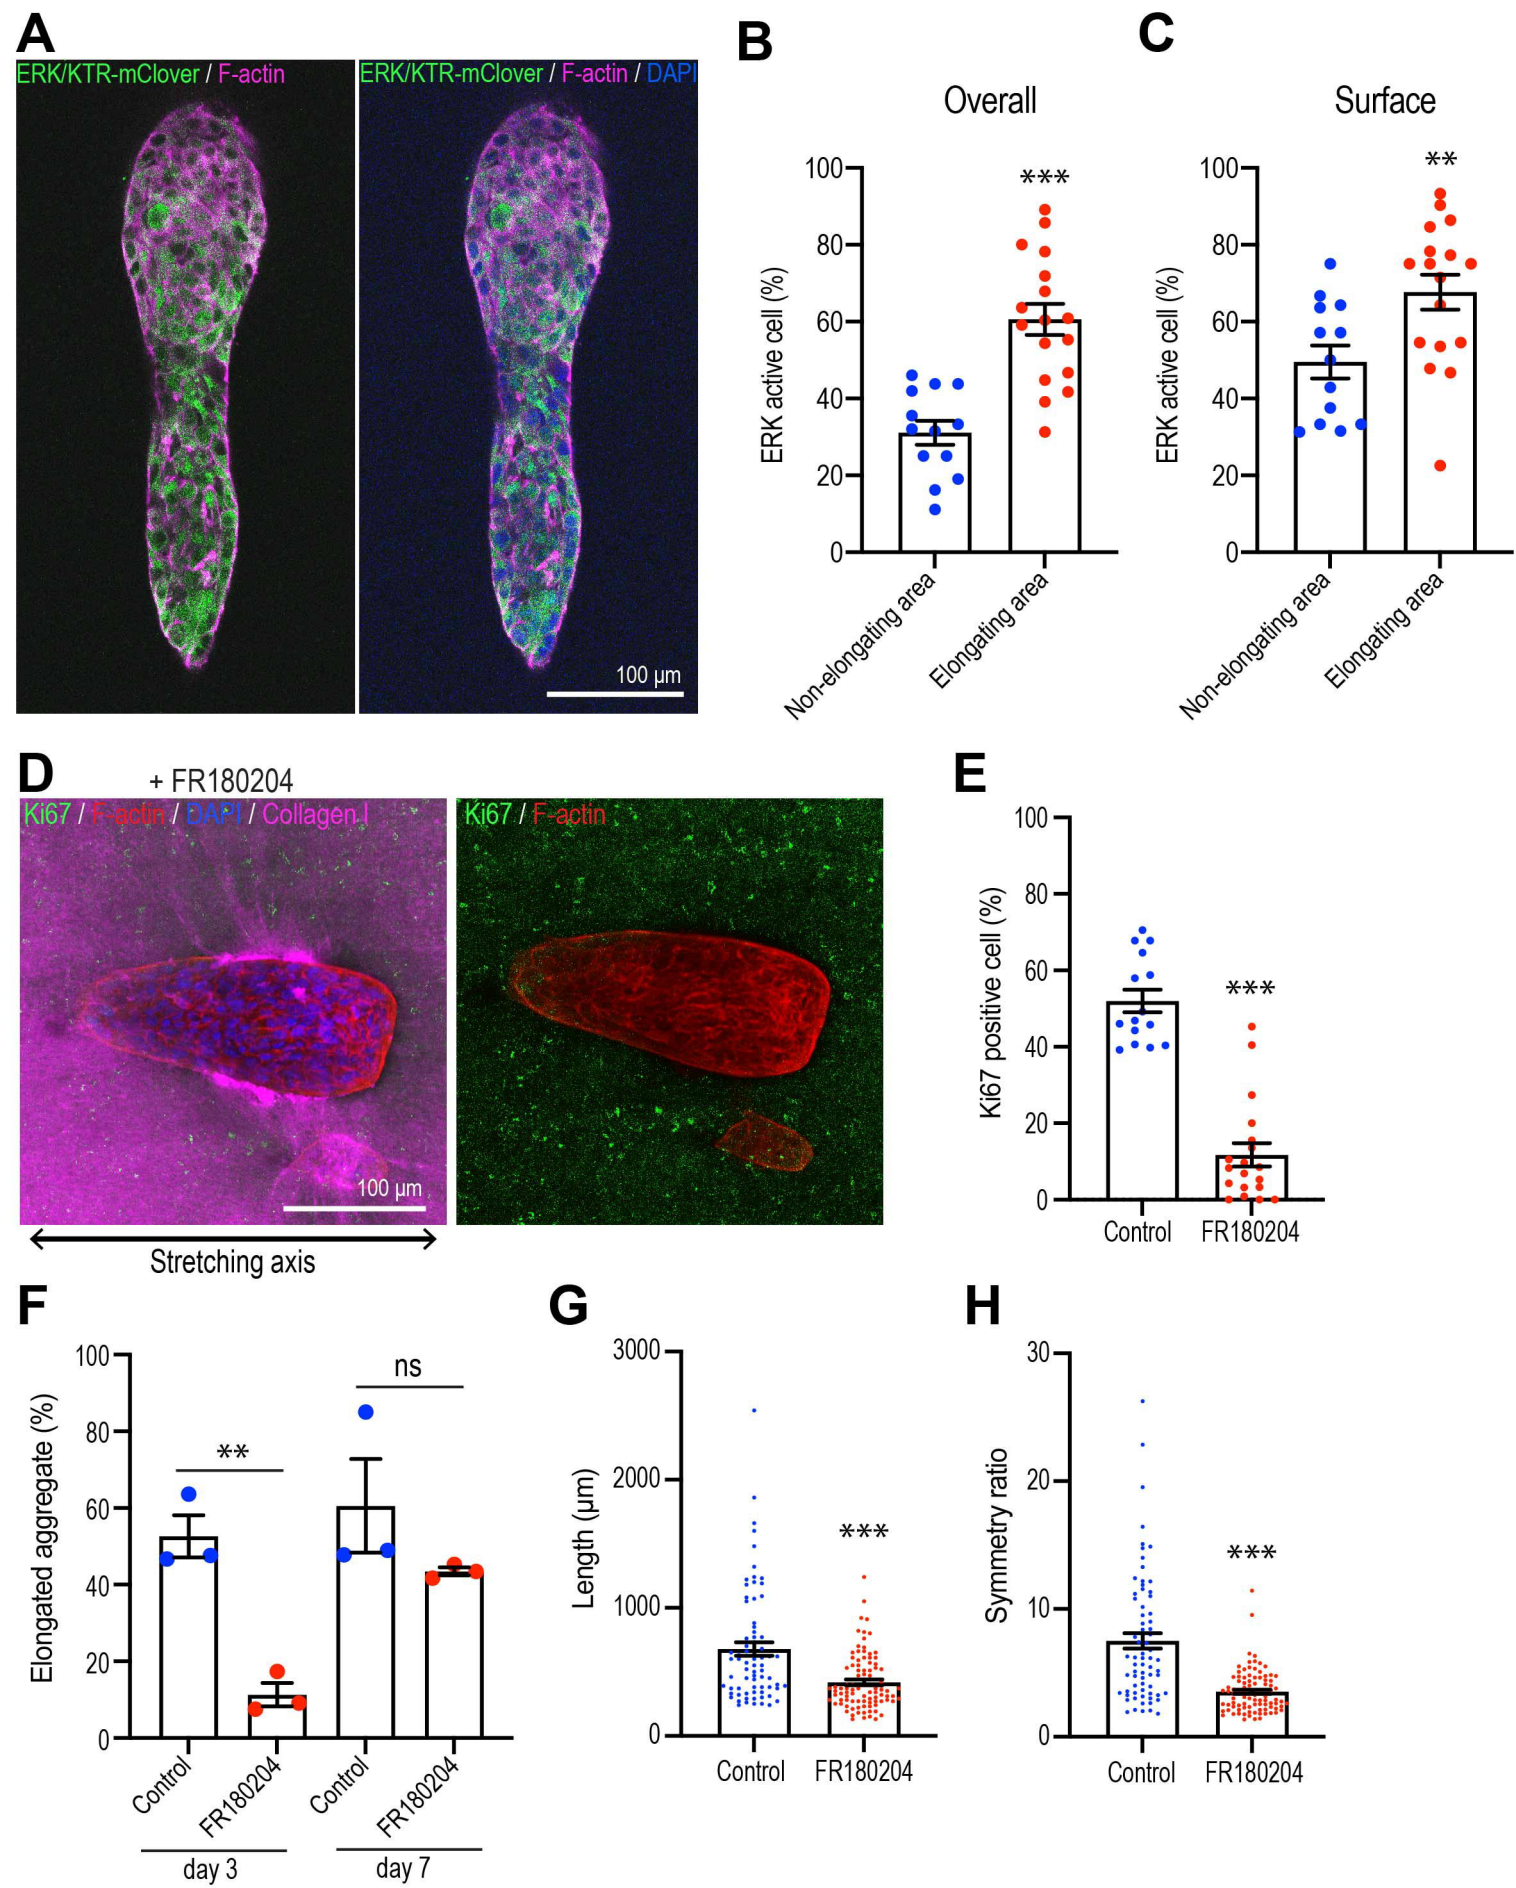



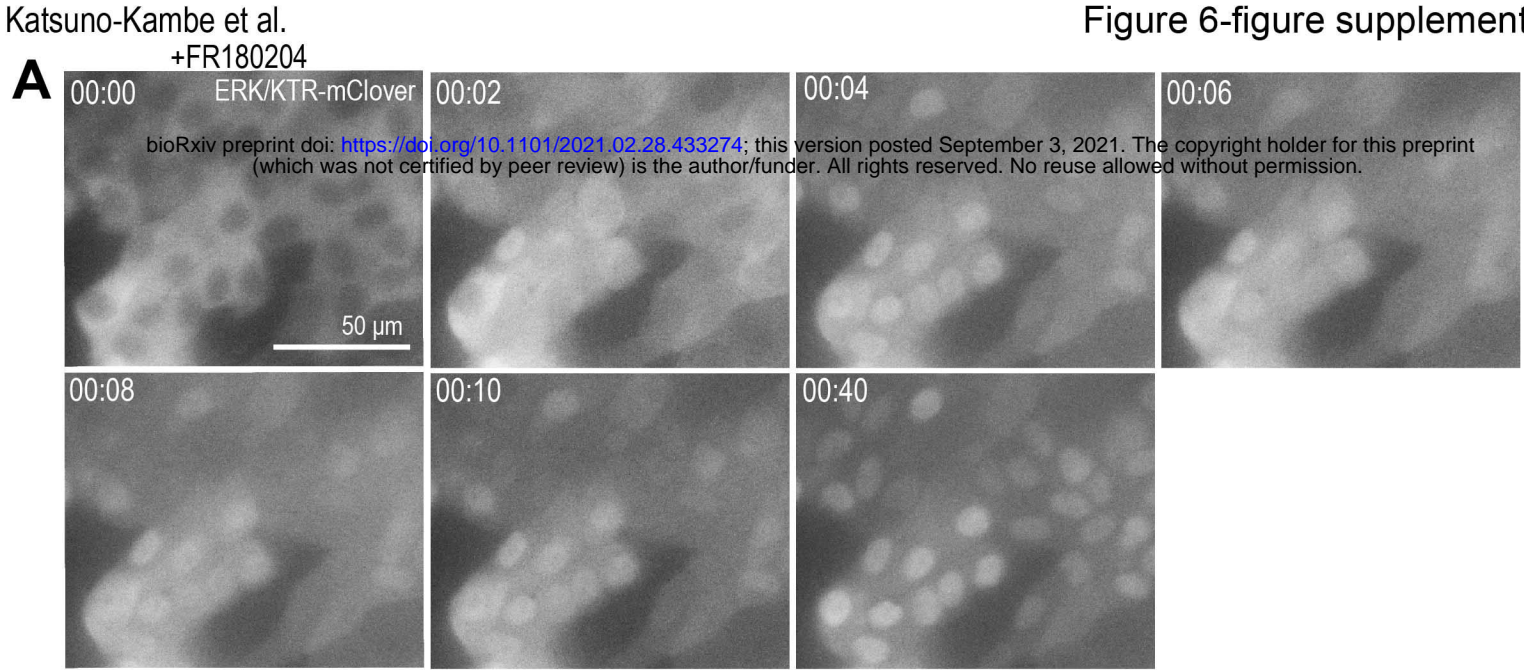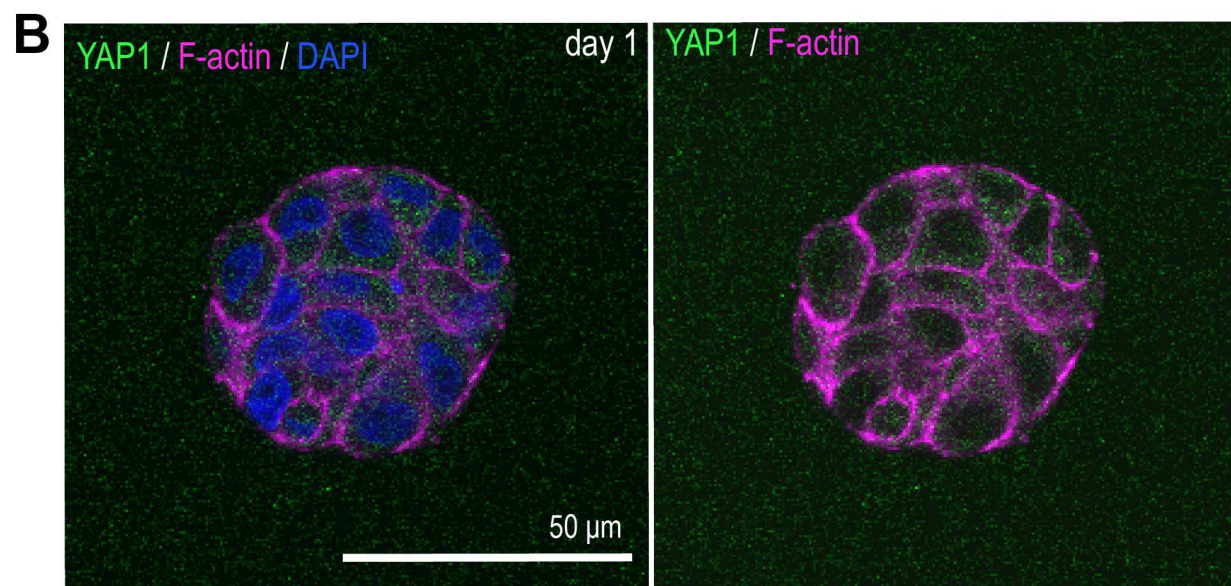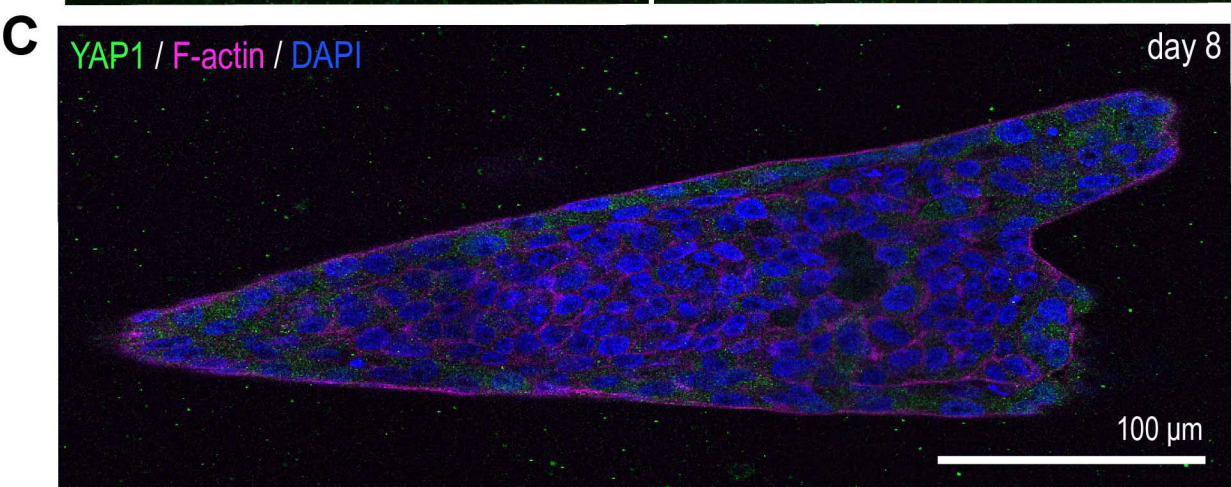



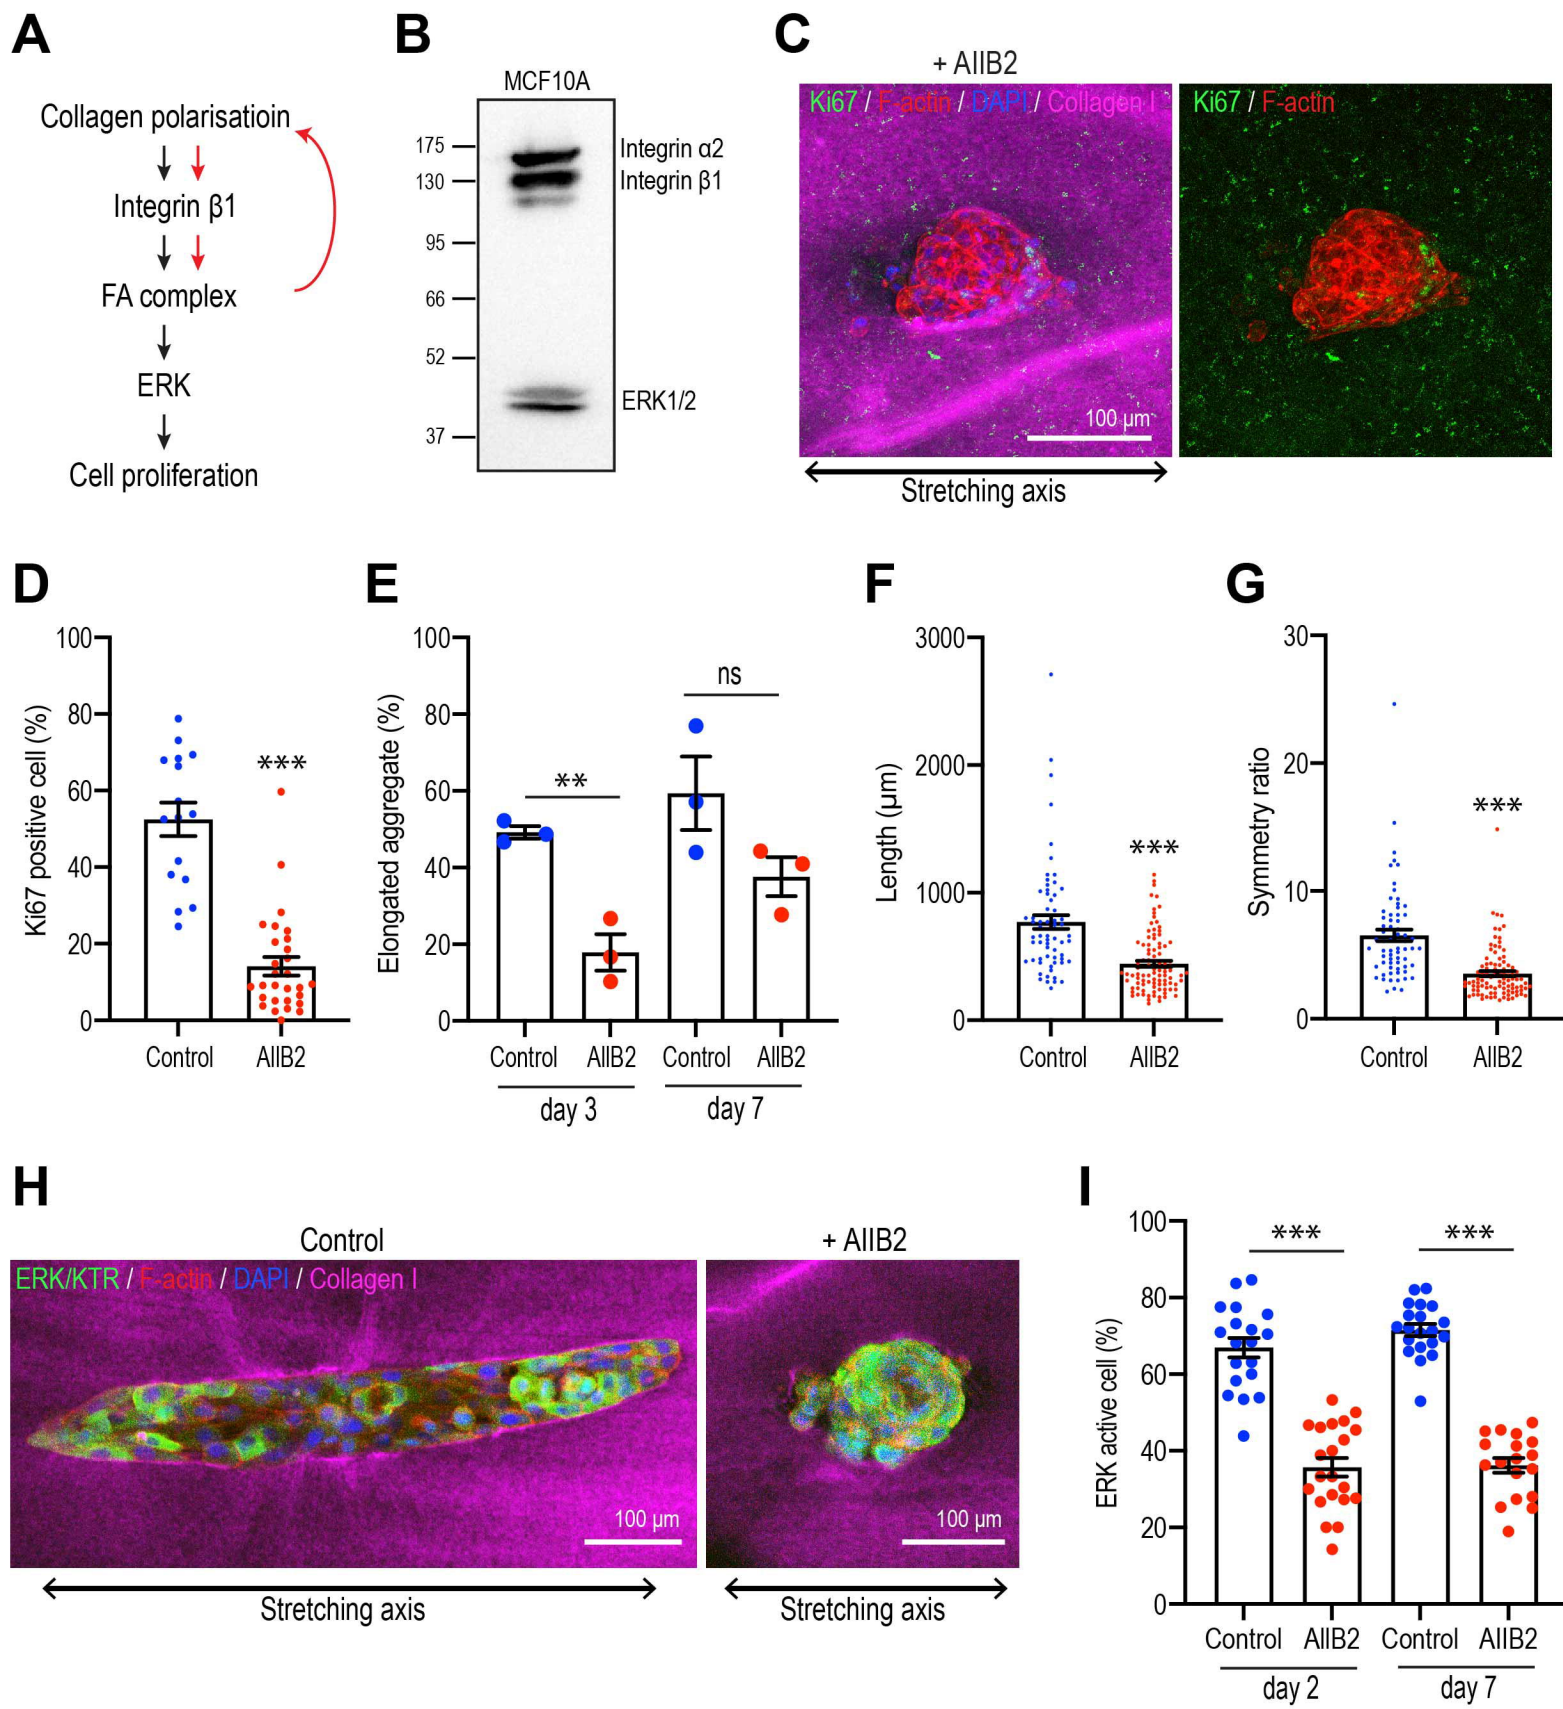

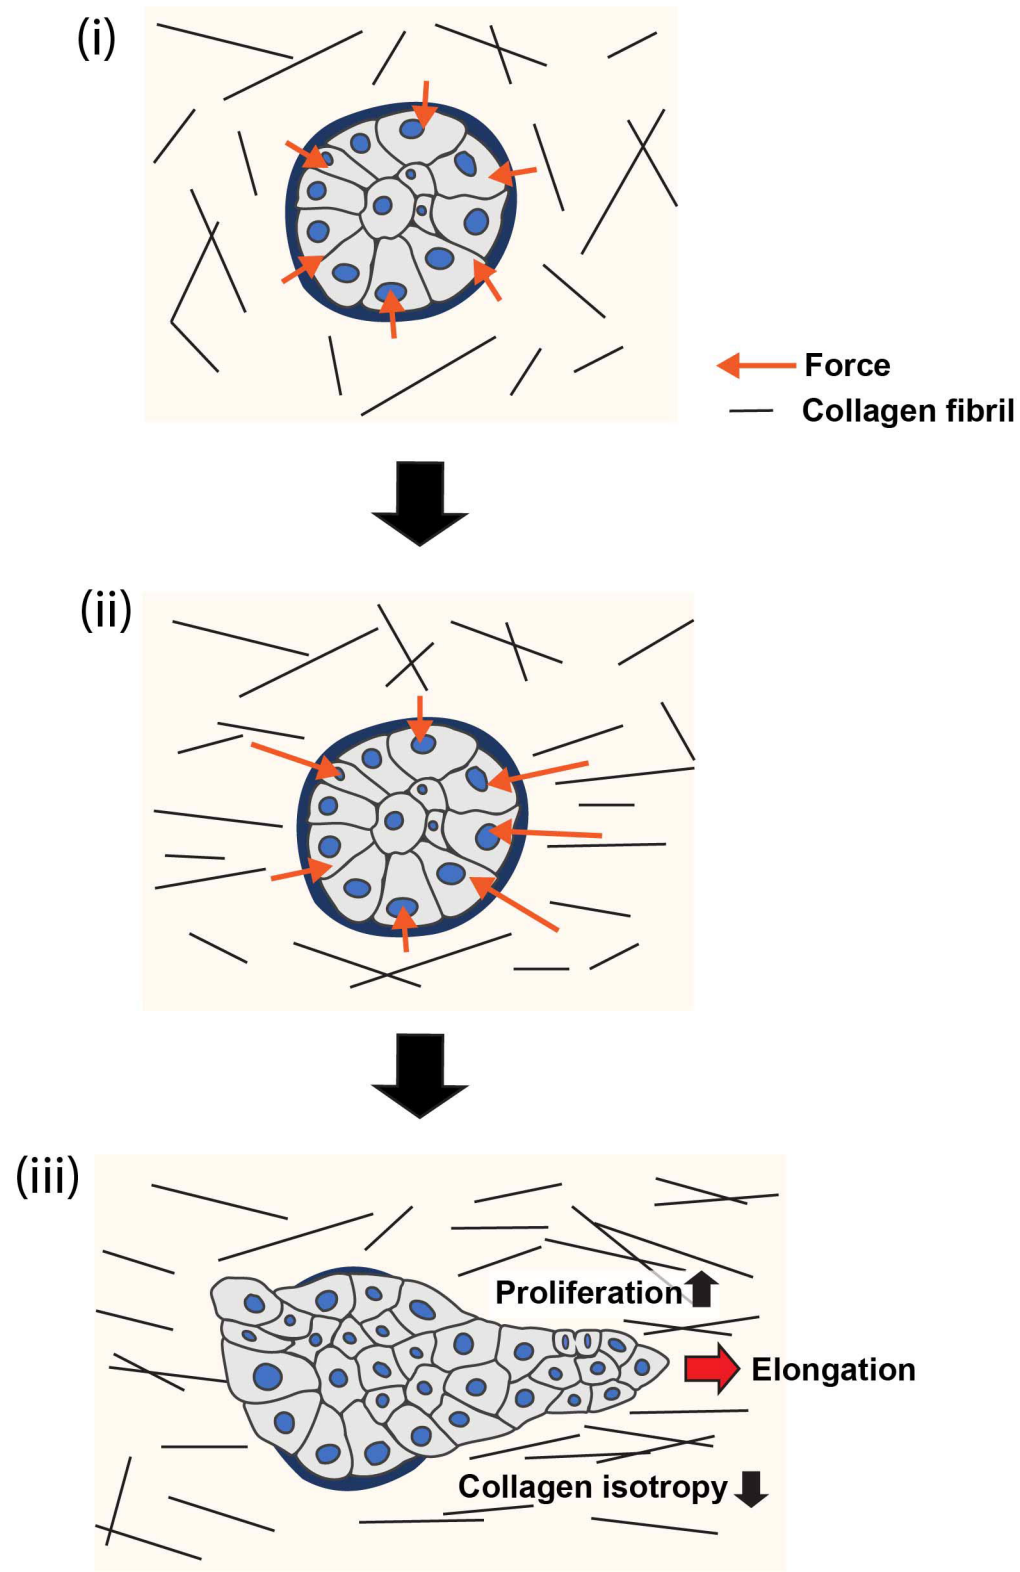

Source: https://www.biorxiv.org/content/biorxiv/early/2021/09/03/2021.02.28.433274.full.pdf
